# Supplementary material for: Synthesis, spectroscopic and structural properties of Sn(ii) and Pb(ii) triflate complexes with soft phosphine and arsine coordination
Source: Royal Society of Chemistry journal article supplement (doi:10.1039/d2dt03687h), 2023-01-01
Supplement: d2dt03687h1.pdf [file d2dt03687h1.pdf]

ESI for

## Synthesis, spectroscopic and structural properties of Sn(II) and Pb(II) triflate complexes with soft phosphine and arsine coordination

Kelsey R. Cairns, Rhys P. King, Robert D. Bannister, William Levason and Gillian Reid\* (email: [G.Reid@soton.ac.uk](mailto:G.Reid@soton.ac.uk))

School of Chemistry, University of Southampton, Southampton SO17 1BJ, UK.

### Contents:

Figure S1 – spectroscopic data for  $[\text{Sn}(\text{OTf})_2\{\text{o-C}_6\text{H}_4(\text{PMe}_2)_2\}]$

Figure S2 – spectroscopic data for  $[\text{Sn}(\text{OTf})_2\{\text{o-C}_6\text{H}_4(\text{AsMe}_2)_2\}]$

Figure S3 – spectroscopic data for  $[\text{Sn}(\text{OTf})_2\{\text{MeC}(\text{CH}_2\text{PPh}_2)_3\}]$

Figure S4 – spectroscopic data for  $[\text{Sn}\{\text{MeC}(\text{CH}_2\text{PPh}_2)_3\}][\text{BAr}^{\text{F}}]_2$

Figure S5 – spectroscopic data for  $[\text{Sn}(\text{OTf})\{\text{PhP}(\text{CH}_2\text{CH}_2\text{PPh}_2)_2\}][\text{OTf}]$

Figure S6 – spectroscopic data for  $[\text{Sn}(\text{OTf})_2\{\text{MeC}(\text{CH}_2\text{AsMe}_2)_3\}]$

Figure S7 – spectroscopic data for  $[\text{Sn}(\text{OTf})\{\text{P}(\text{CH}_2\text{CH}_2\text{PPh}_2)_3\}][\text{OTf}]$

Figure S8 – spectroscopic data for  $[\text{Sn}(\text{OTf})_2\{\text{o-C}_6\text{H}_4(\text{PPh}_2)_2\}]$

Figure S9 – spectroscopic data for  $[\text{Pb}(\text{OTf})_2\{\text{o-C}_6\text{H}_4(\text{PMe}_2)_2\}]$

Figure S10 – spectroscopic data for  $[\text{Pb}(\text{OTf})_2\{\text{o-C}_6\text{H}_4(\text{AsMe}_2)_2\}]$

Figure S11 – spectroscopic data for  $[\text{Pb}(\text{OTf})_2\{\text{MeC}(\text{CH}_2\text{PPh}_2)_3\}]$

Figure S12 – spectroscopic data for  $[\text{Pb}\{\text{MeC}(\text{CH}_2\text{PPh}_2)_3\}][\text{BAr}^{\text{F}}]_2$

Figure S13 – spectroscopic data for  $[\text{Pb}(\text{OTf})_2\{\text{MeC}(\text{CH}_2\text{AsMe}_2)_3\}]$

Figure S14 – spectroscopic data for  $[\text{Pb}(\text{OTf})\{\text{P}(\text{CH}_2\text{CH}_2\text{PPh}_2)_3\}][\text{OTf}]$

Figure S15 – spectroscopic data for  $[\text{Ge}\{\text{MeC}(\text{CH}_2\text{PPh}_2)_3\}][\text{BAr}^{\text{F}}]_2$

Figure S16 – IR spectrum for  $\text{Sn}(\text{OTf})_2$

Figure S17 – IR spectrum for  $\text{Pb}(\text{OTf})_2$

Table S1 - X-ray crystallographic parameters

Table S2 – Experimental (X-ray) vs. calculated (DFT, B3LYP-D3) metrics for  $[\text{M}\{\text{MeC}(\text{CH}_2\text{PPh}_2)_3\}]^{2+}$  (M = Ge, Sn, Pb)

**Figure S1 – [Sn(OTf)<sub>2</sub>{*o*-C<sub>6</sub>H<sub>4</sub>(PMe<sub>2</sub>)<sub>2</sub>}**

**S1.1 – <sup>1</sup>HMR spectrum (298 K, CD<sub>3</sub>CN)**

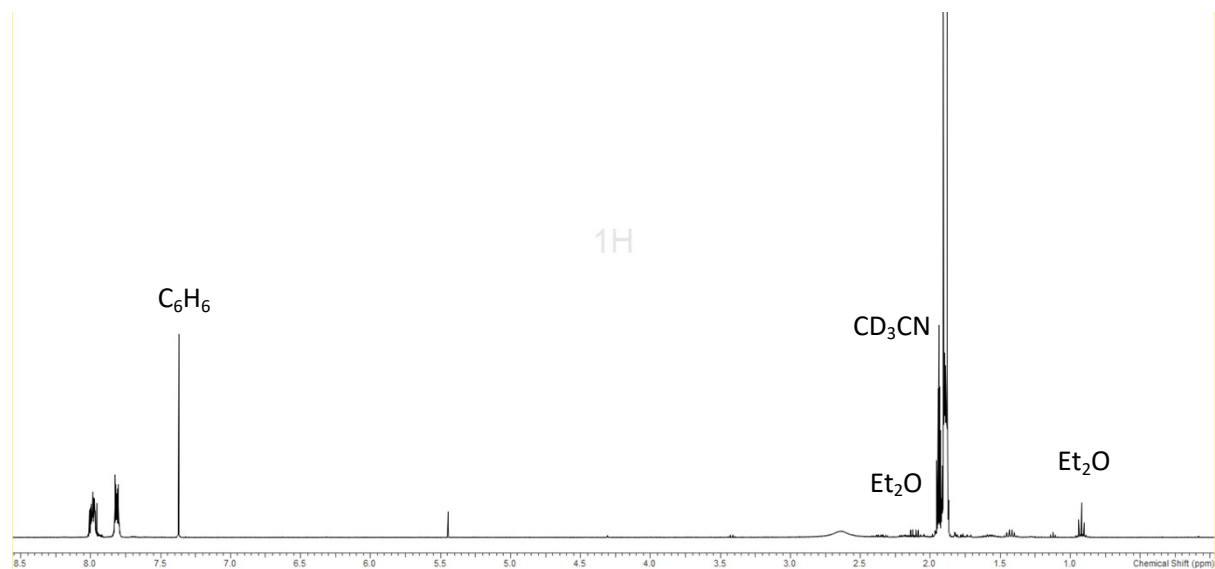

**S1.2 – <sup>19</sup>F{<sup>1</sup>H} NMR spectrum (298 K, CD<sub>3</sub>CN)**

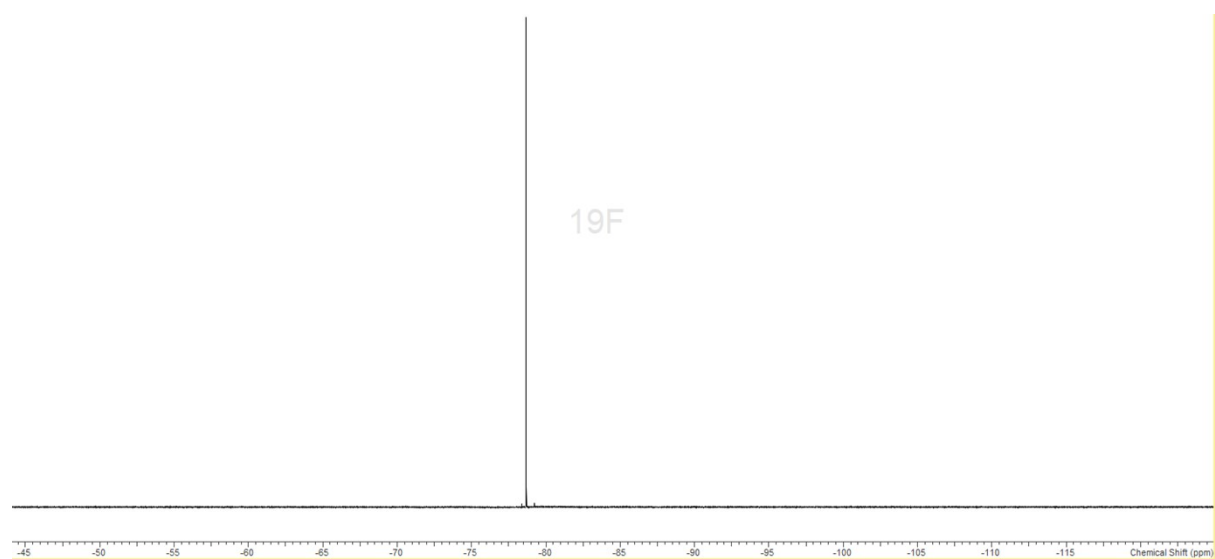

S1.3 –  $^{31}\text{P}\{^1\text{H}\}$  NMR spectrum (298 K,  $\text{CD}_3\text{CN}$ ) \* = unidentified impurity

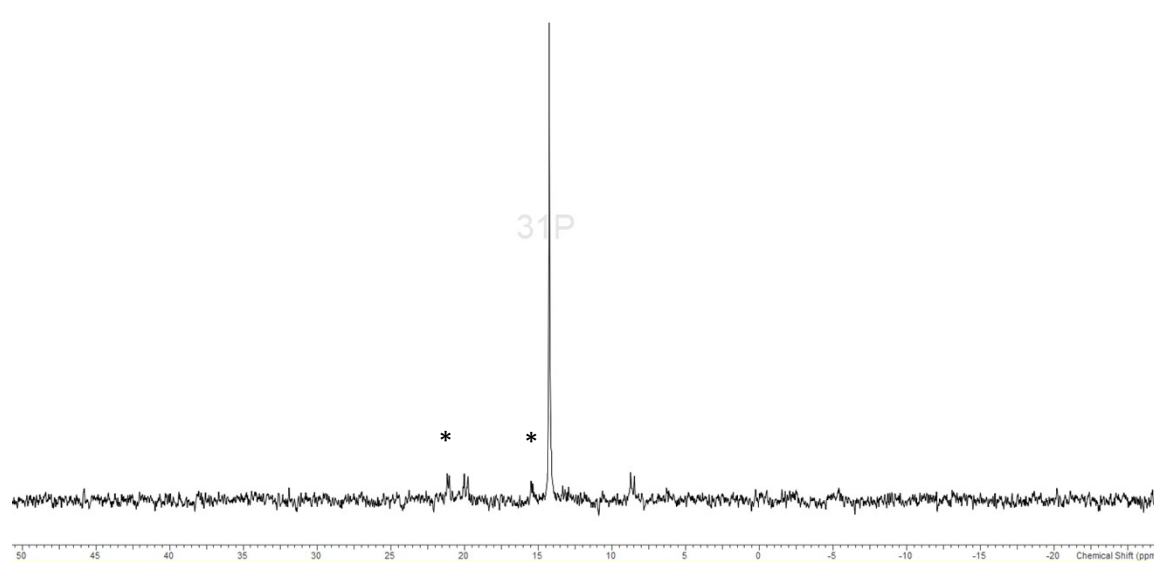

S1.4 –  $^{119}\text{Sn}$  NMR spectrum (298 K,  $\text{CD}_3\text{CN}$ ) \* = unidentified impurity

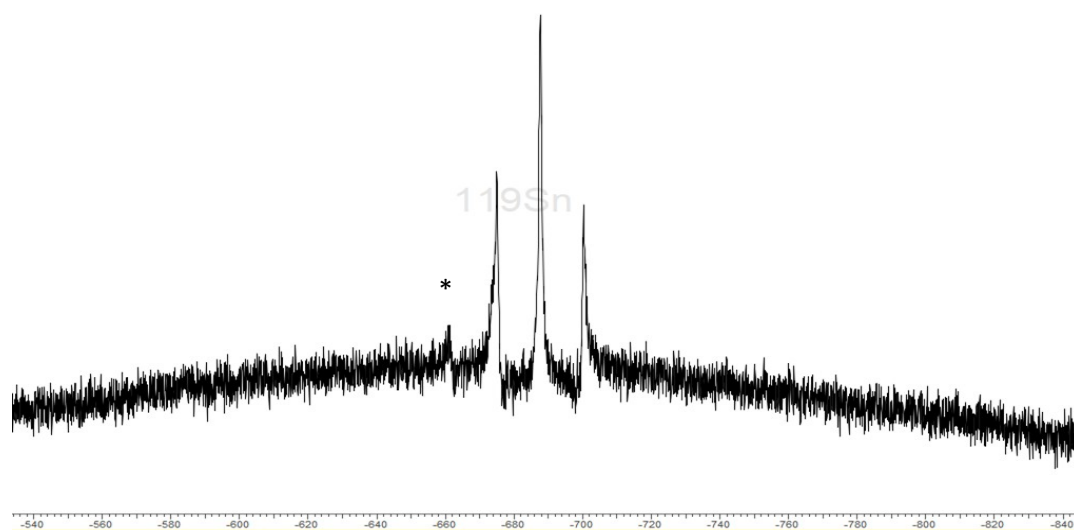

S1.5 – IR spectrum (Nujol)

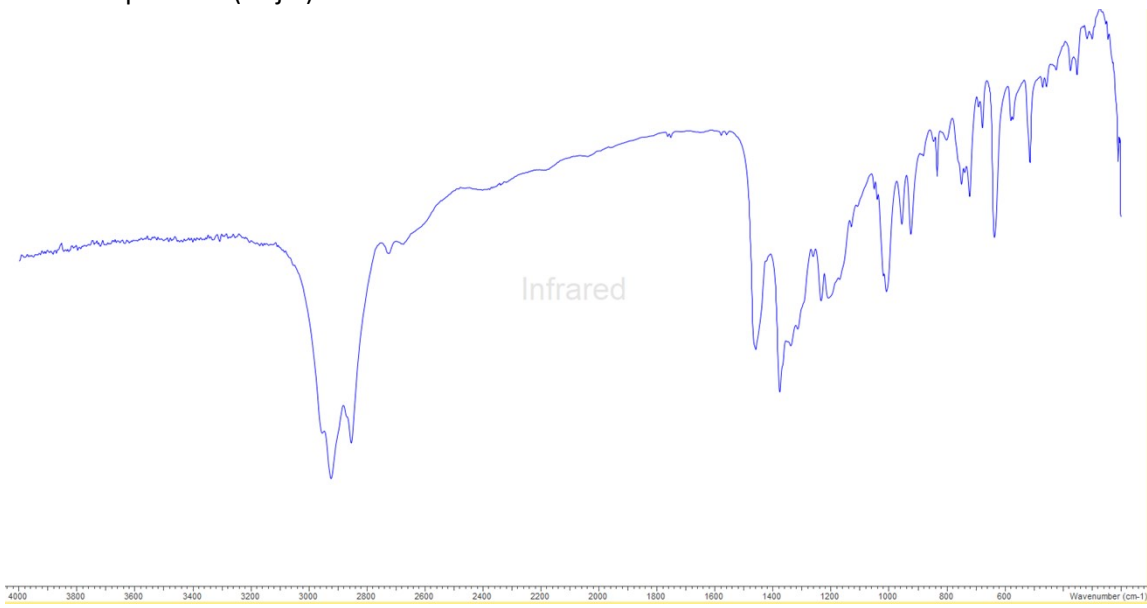

**Figure S2**  $[\text{Sn}(\text{OTf})_2\{\text{o-C}_6\text{H}_4(\text{AsMe}_2)_2\}]$

**S2.1** –  $^1\text{H}$  NMR spectrum (298 K,  $\text{CD}_3\text{CN}$ )

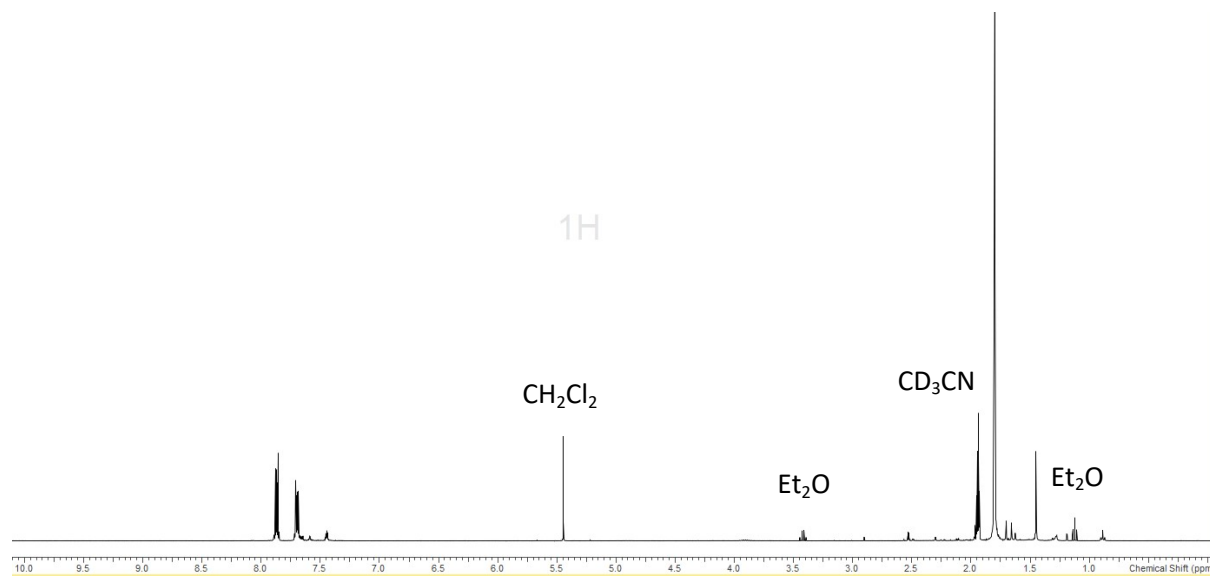

**S2.2** –  $^{19}\text{F}\{^1\text{H}\}$  NMR spectrum (298 K,  $\text{CD}_3\text{CN}$ )

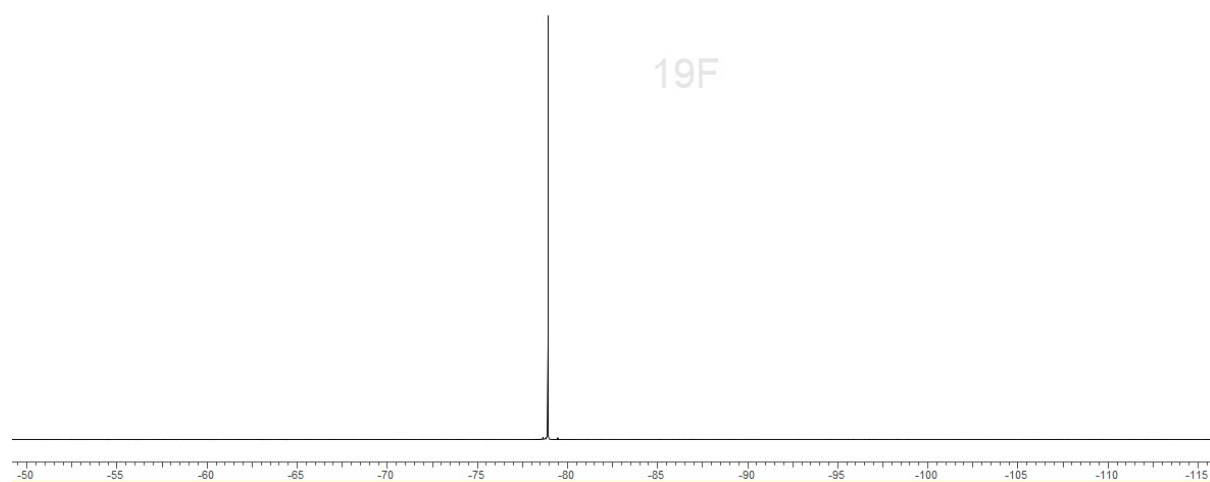

**S2.3** –  $^{119}\text{Sn}$  NMR spectrum (258 K,  $\text{CD}_3\text{CN}$ )

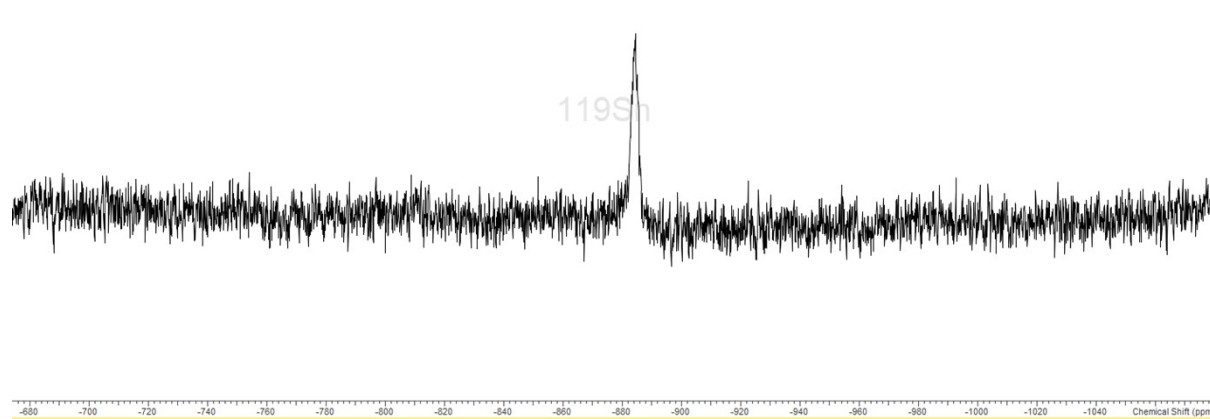

**Figure S3 – [Sn(OTf)<sub>2</sub>{MeC(CH<sub>2</sub>PPh<sub>2</sub>)<sub>3</sub>}**

S3.1 – <sup>1</sup>H NMR spectrum (298 K, CD<sub>3</sub>CN)

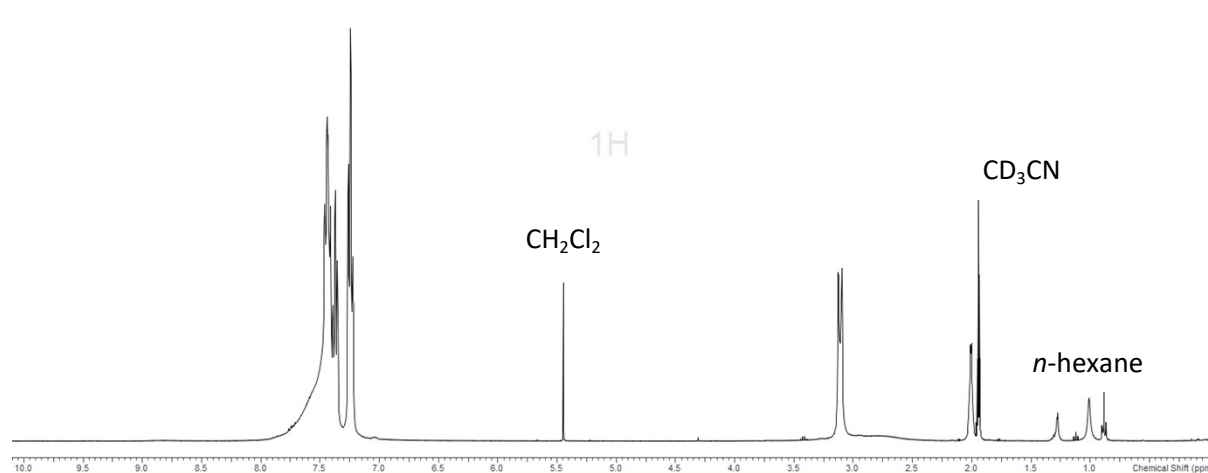

S3.2 – <sup>19</sup>F{<sup>1</sup>H} NMR spectrum (298 K, CD<sub>3</sub>CN)

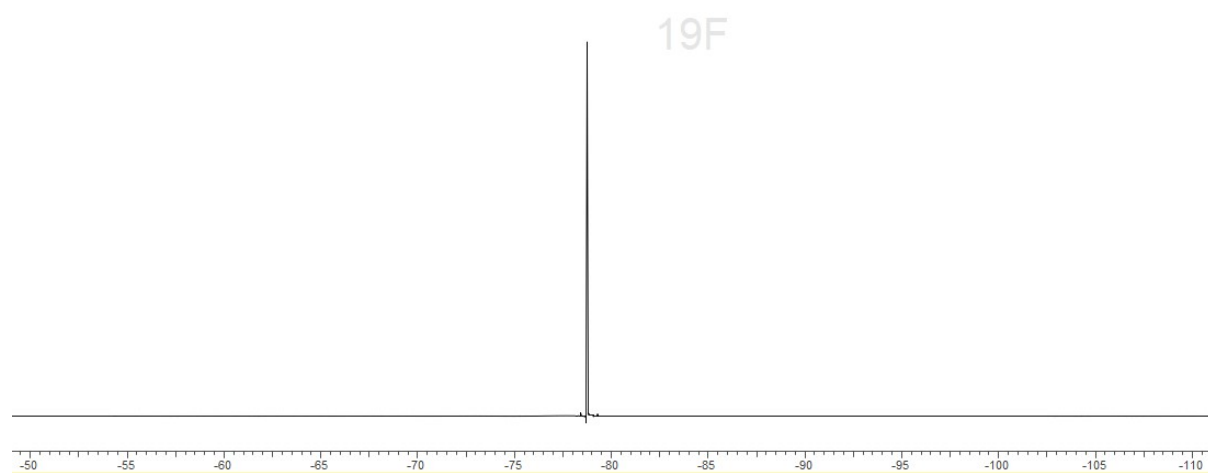

S3.3 – <sup>31</sup>P{<sup>1</sup>H} NMR spectrum (298 K, CD<sub>3</sub>CN) \* = unidentified impurity

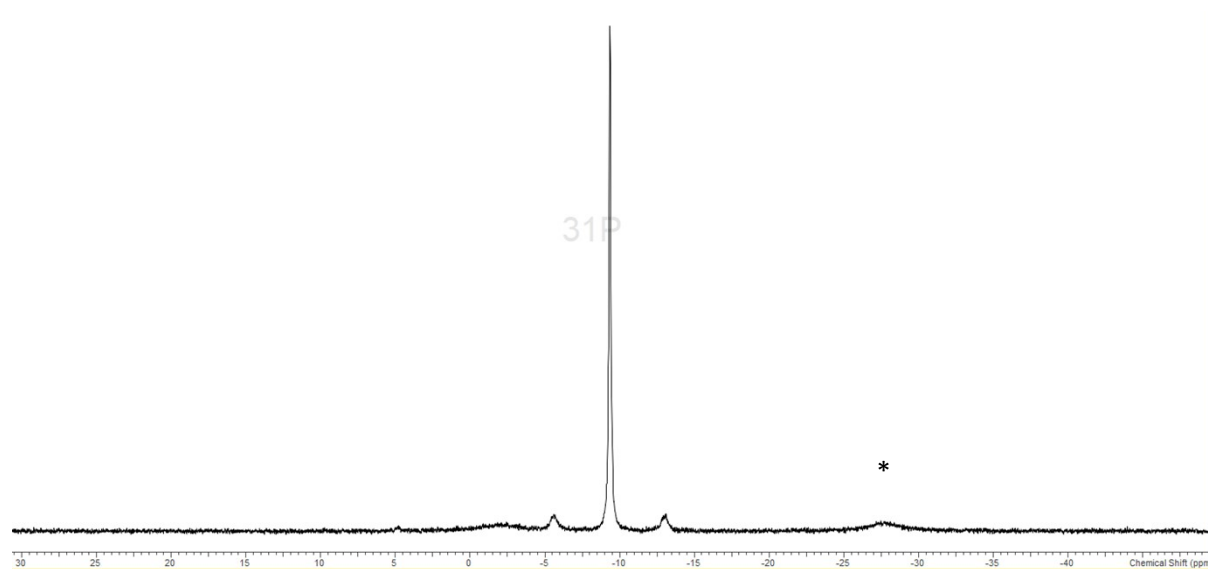

S3.4 –  $^{119}\text{Sn}$  NMR spectrum (298 K,  $\text{CD}_3\text{CN}$ )

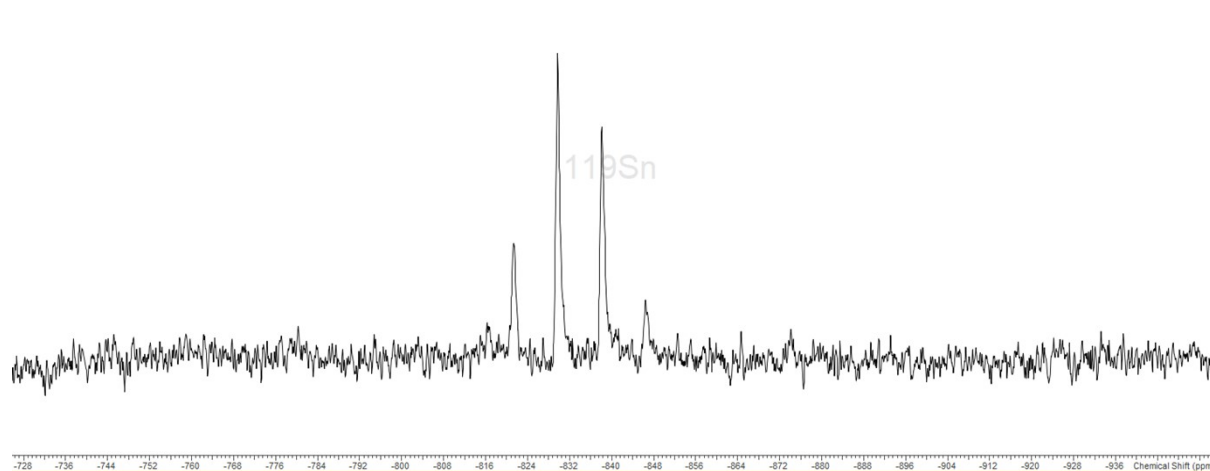

S3.5 – IR spectrum (Nujol)

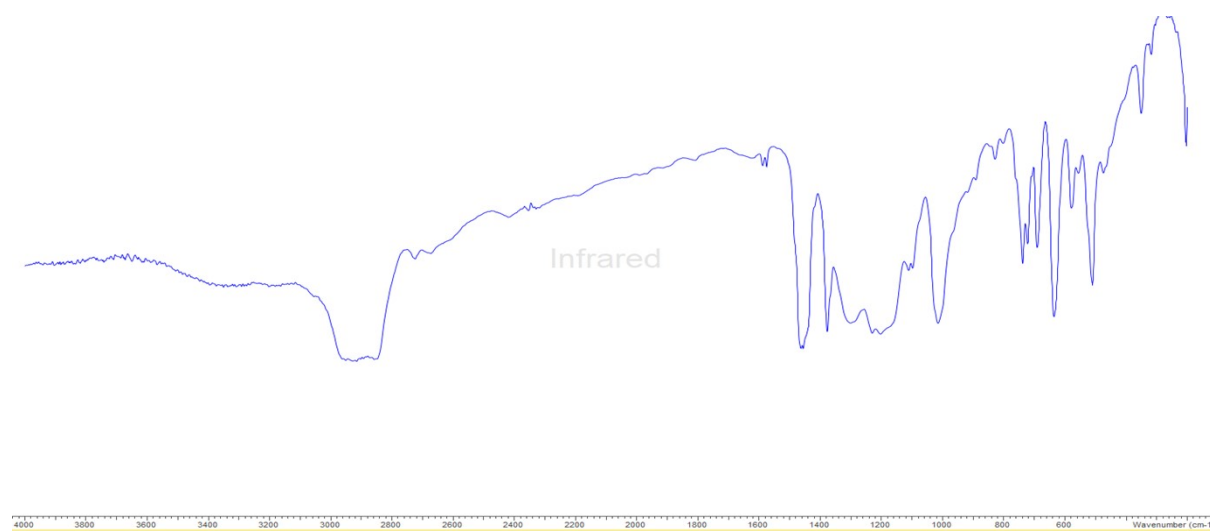

Figure S4 –  $[\text{Sn}\{\text{MeC}(\text{CH}_2\text{PPh}_2)_3\}][\text{BAR}^{\text{F}}]_2$

S4.1 –  $^1\text{H}$  NMR spectrum (298 K,  $\text{CD}_3\text{CN}$ )

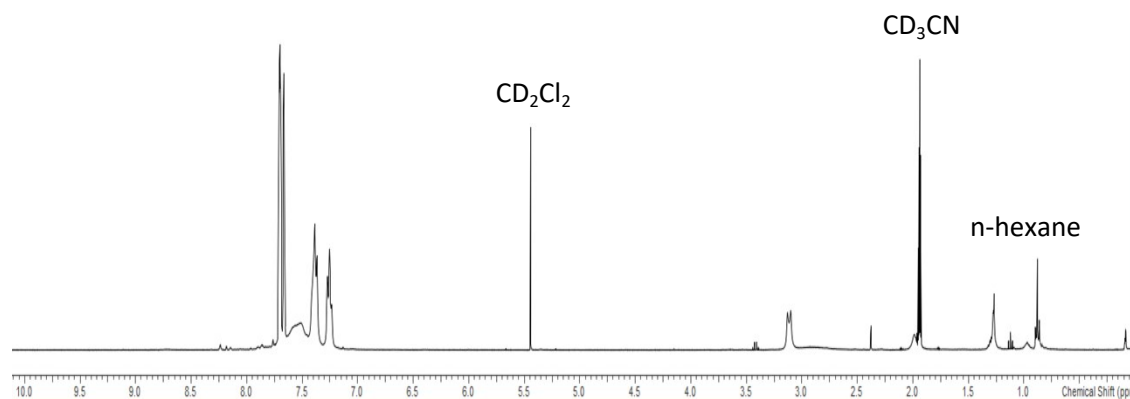

S4.2 –  $^{19}\text{F}\{^1\text{H}\}$  NMR spectrum (298 K,  $\text{CD}_3\text{CN}$ )

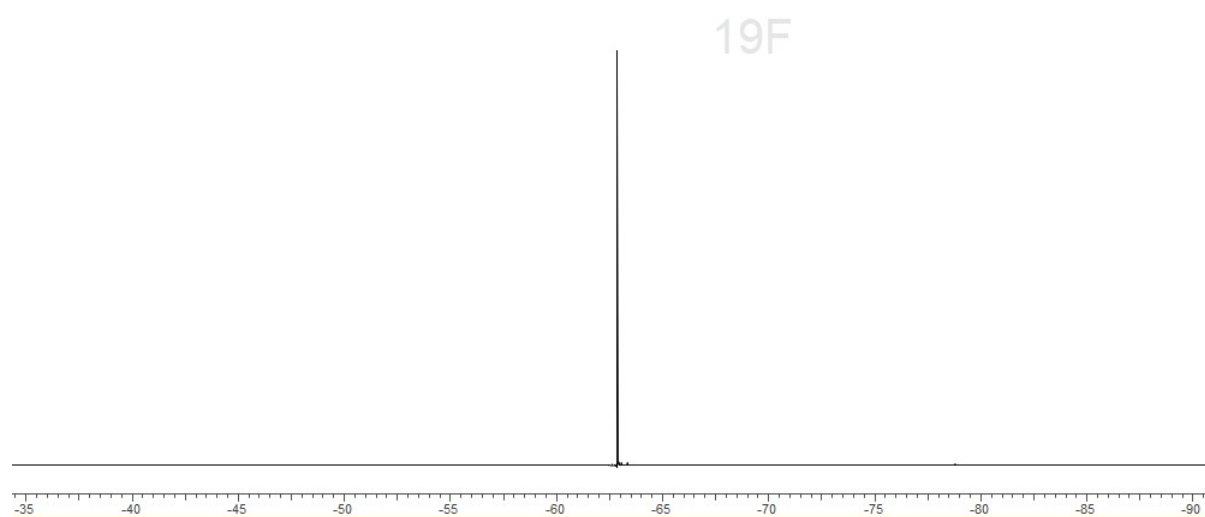

S4.3 –  $^{31}\text{P}\{^1\text{H}\}$  NMR spectrum (298 K,  $\text{CD}_3\text{CN}$ )

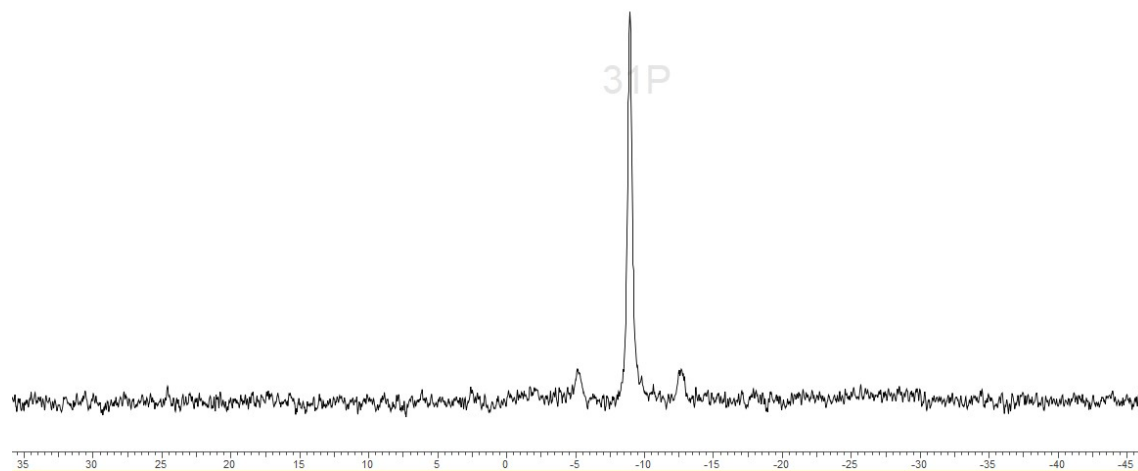



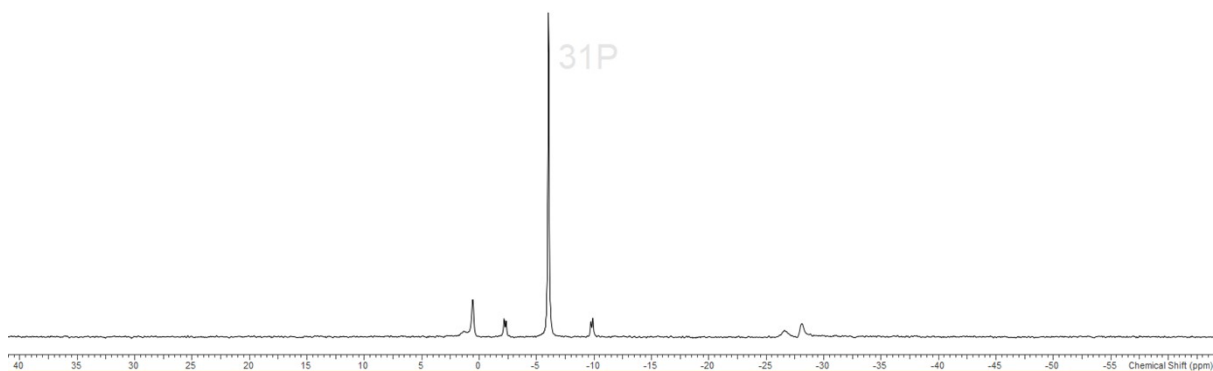

S4.4 -  $^{31}\text{P}\{^1\text{H}\}$  NMR spectrum (258 K,  $\text{CD}_3\text{CN}$ ) \* = unidentified impurity

S4.5 -  $^{119}\text{Sn}$  NMR spectrum (298 K,  $\text{CD}_3\text{CN}$ )

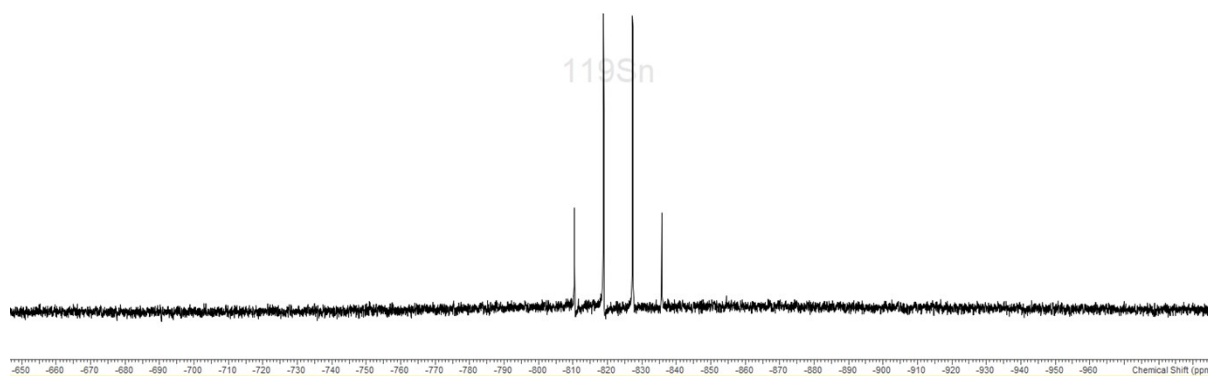

S4.6 -  $^{119}\text{Sn}$  NMR spectrum (258 K,  $\text{CD}_3\text{CN}$ )

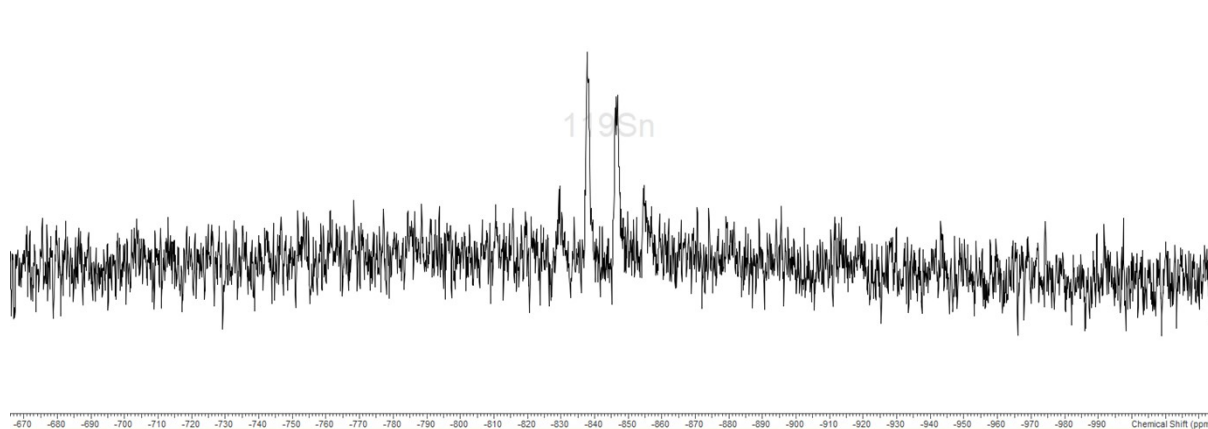

S4.7 – IR spectrum (Nujol)

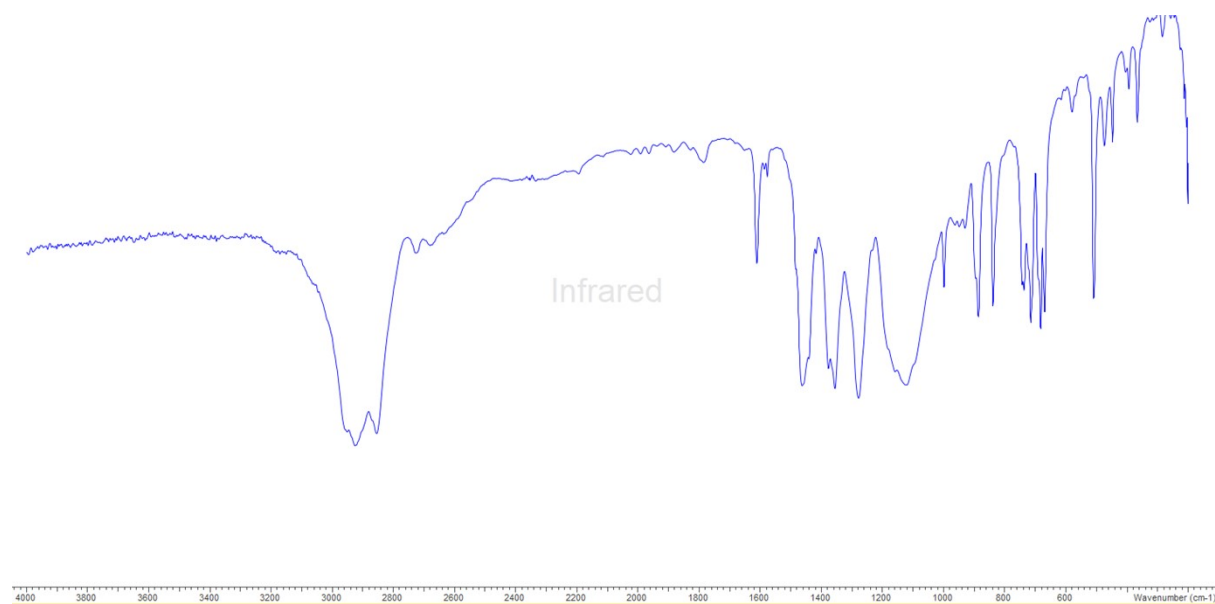

**Figure S5 – [Sn(OTf){PhP(CH<sub>2</sub>CH<sub>2</sub>PPh<sub>2</sub>)<sub>2</sub>}] [OTf]**

**S5.1 – <sup>1</sup>H NMR spectrum (298 K, CD<sub>3</sub>CN)**

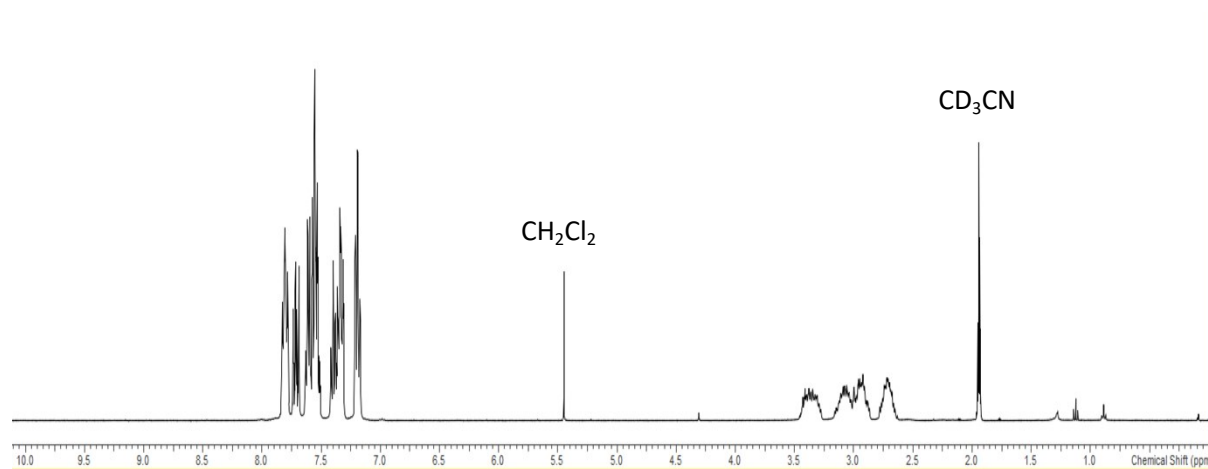

**S5.2 – <sup>19</sup>F{<sup>1</sup>H} NMR spectrum (298 K, CD<sub>3</sub>CN)**

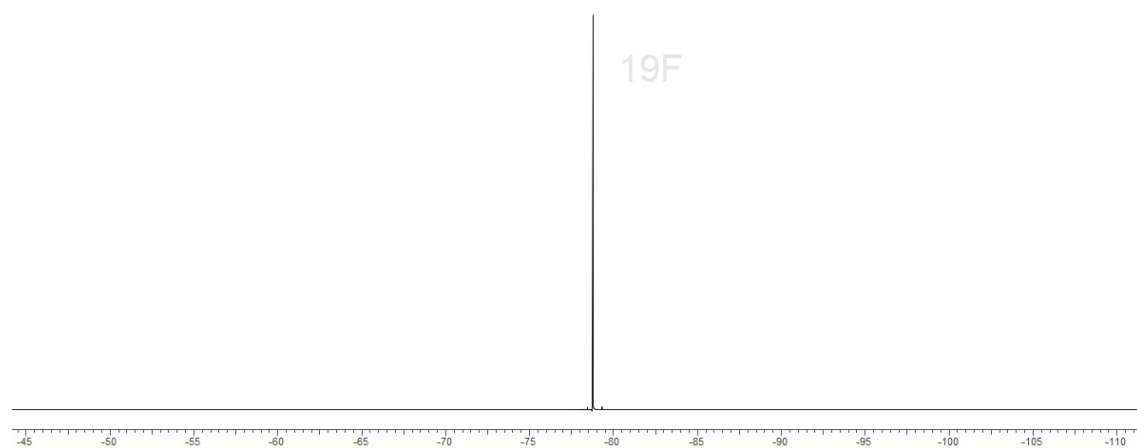

**S5.3 – <sup>31</sup>P{<sup>1</sup>H} NMR spectrum (298 K, CD<sub>3</sub>CN)**

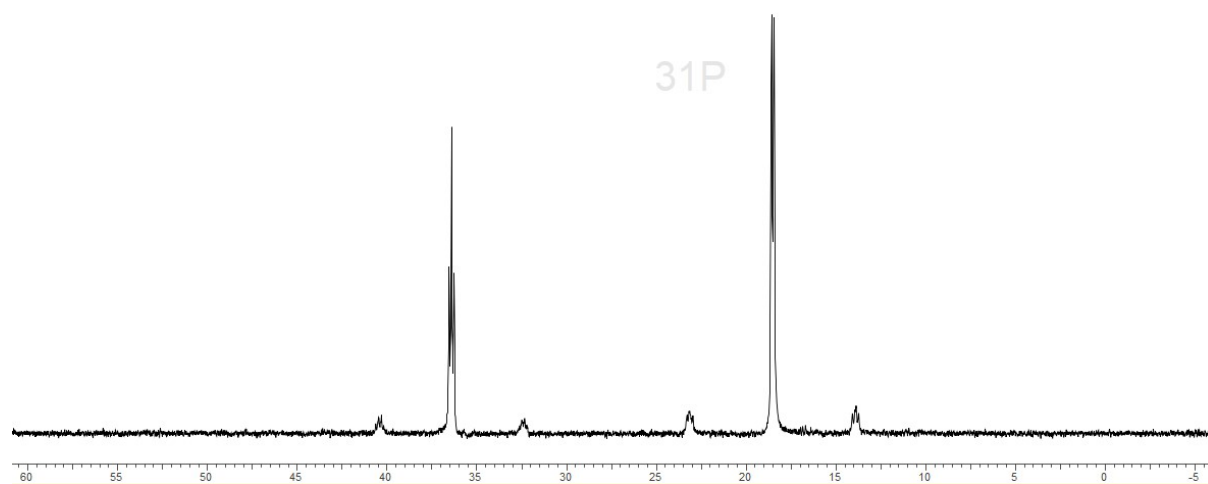

S5.4 –  $^{119}\text{Sn}$  NMR spectrum (298 K,  $\text{CD}_3\text{CN}$ )

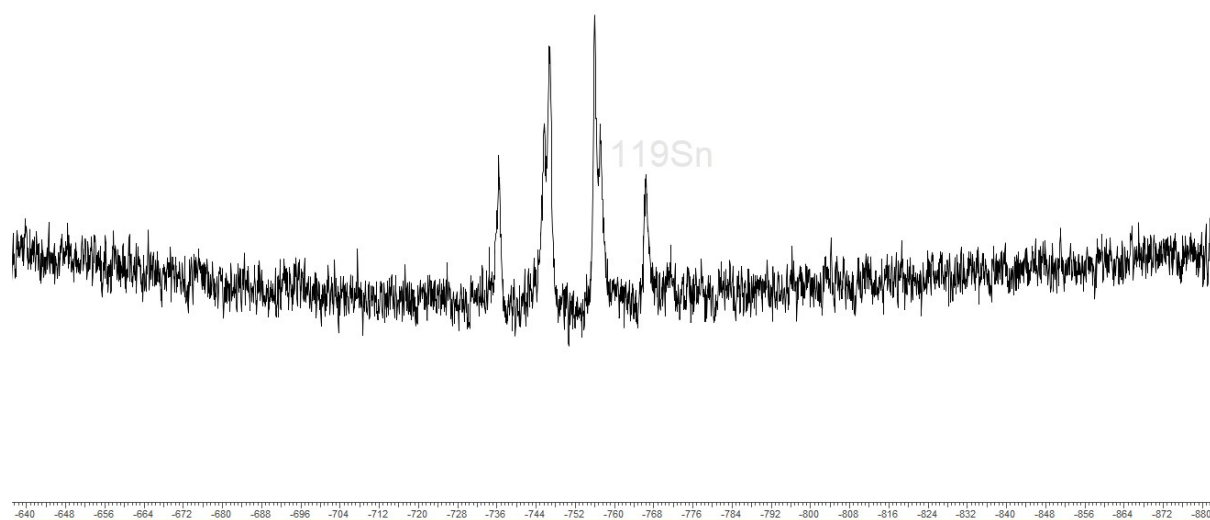

S5.5 – IR spectrum (Nujol)

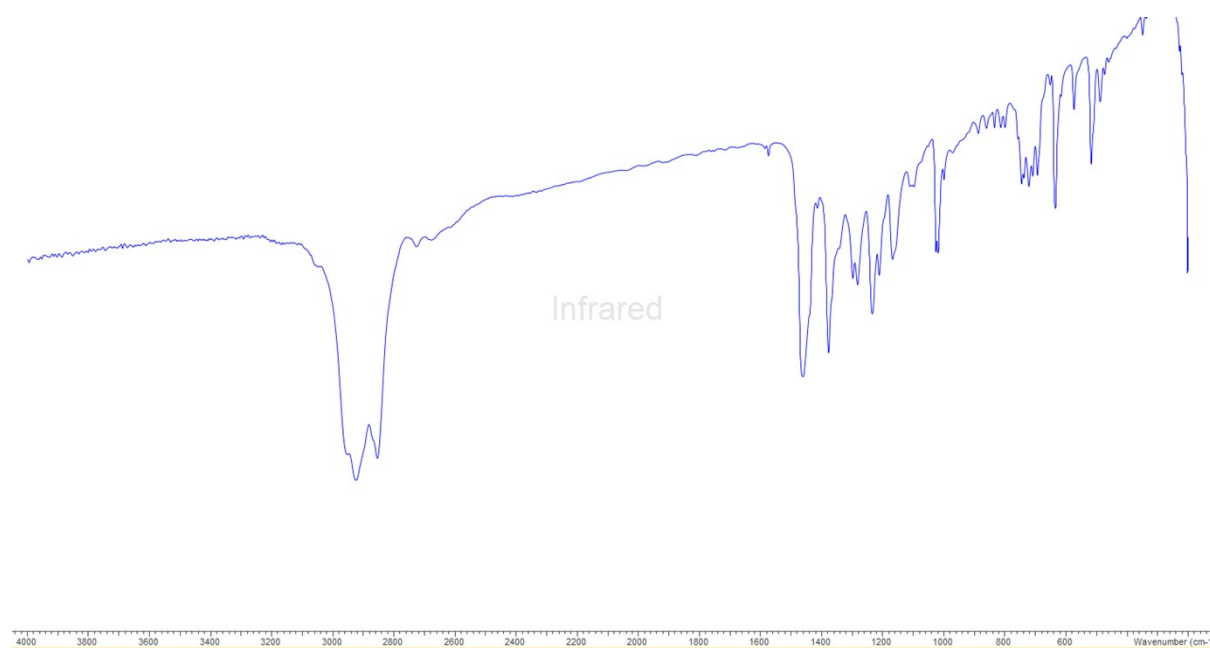

**Figure S6 – [Sn(OTf)<sub>2</sub>{MeC(CH<sub>2</sub>AsMe<sub>2</sub>)<sub>3</sub>}**

S6.1 – <sup>1</sup>H NMR spectrum (298 K, CD<sub>3</sub>CN)

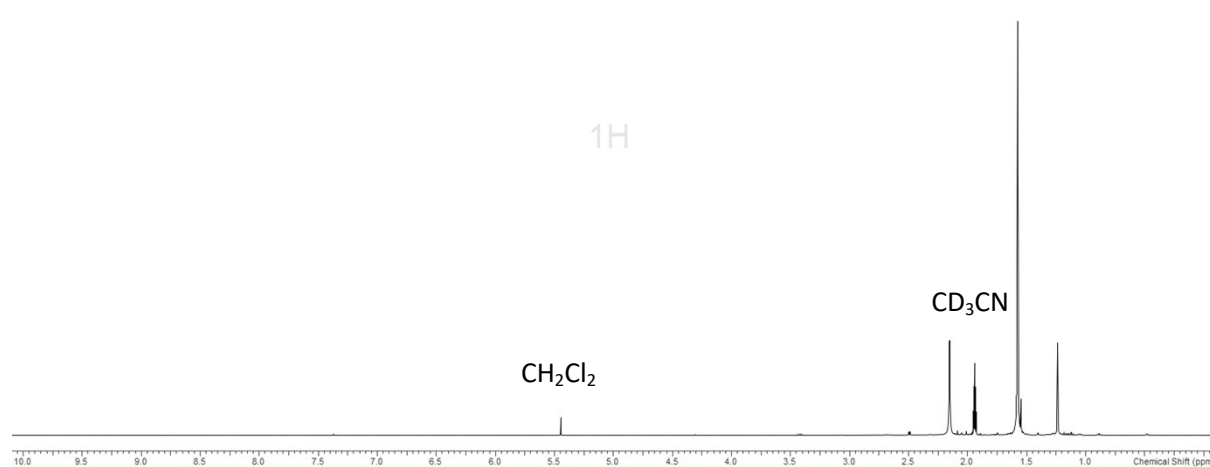

S6.2 – <sup>19</sup>F{<sup>1</sup>H} NMR spectrum (298 K, CD<sub>3</sub>CN)

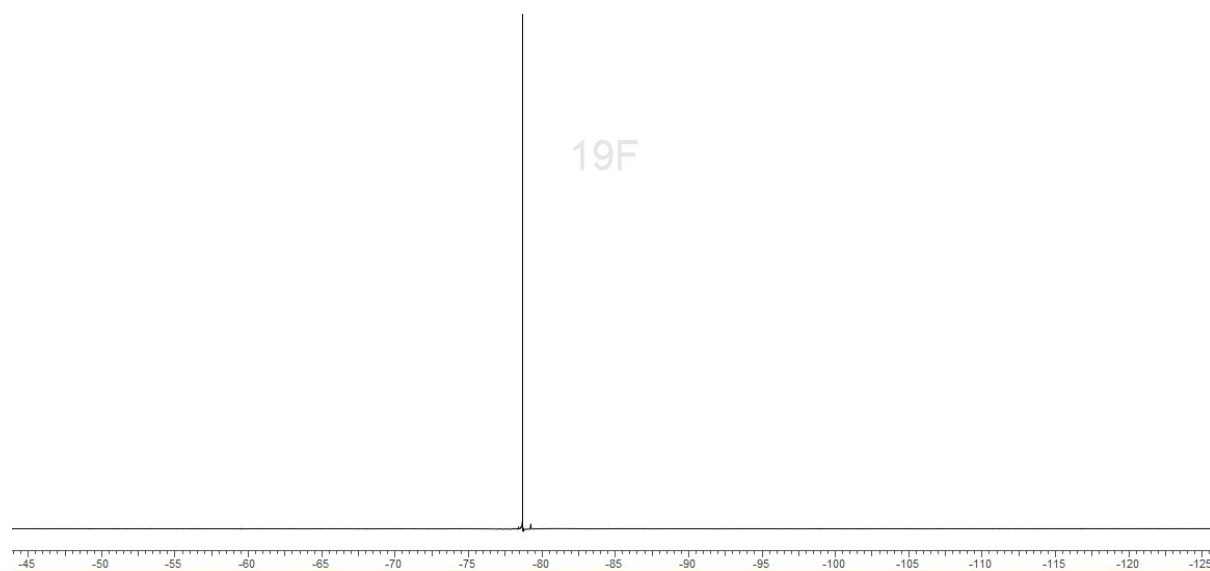

S6.3 –  $^{119}\text{Sn}$  NMR spectrum (258 K,  $\text{CD}_3\text{CN}$ )

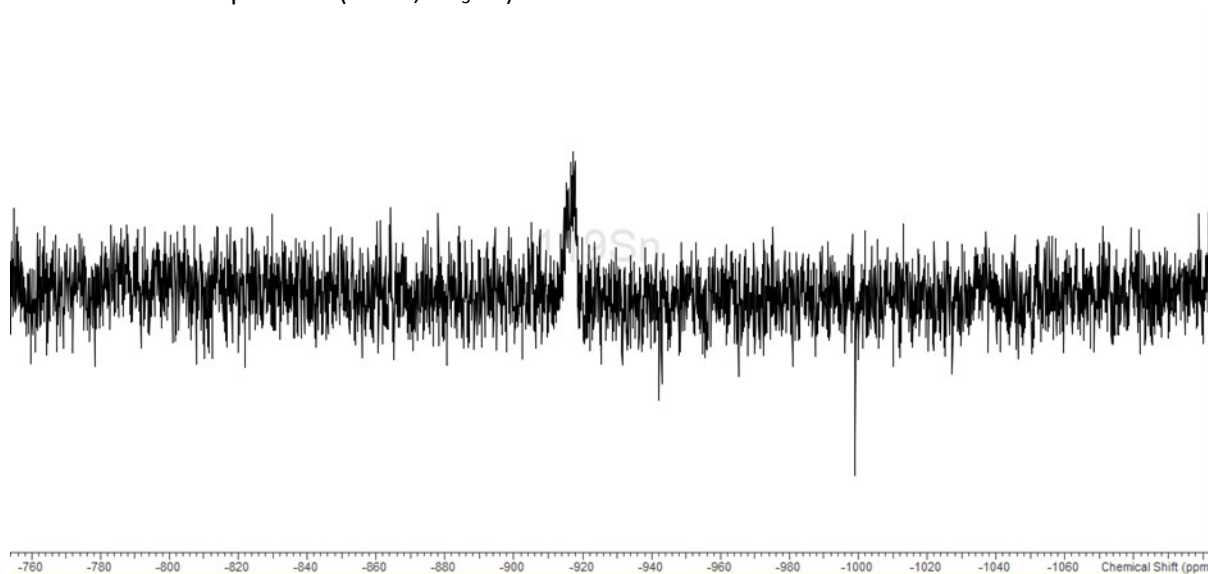

S6.4 – IR spectrum (Nujol)

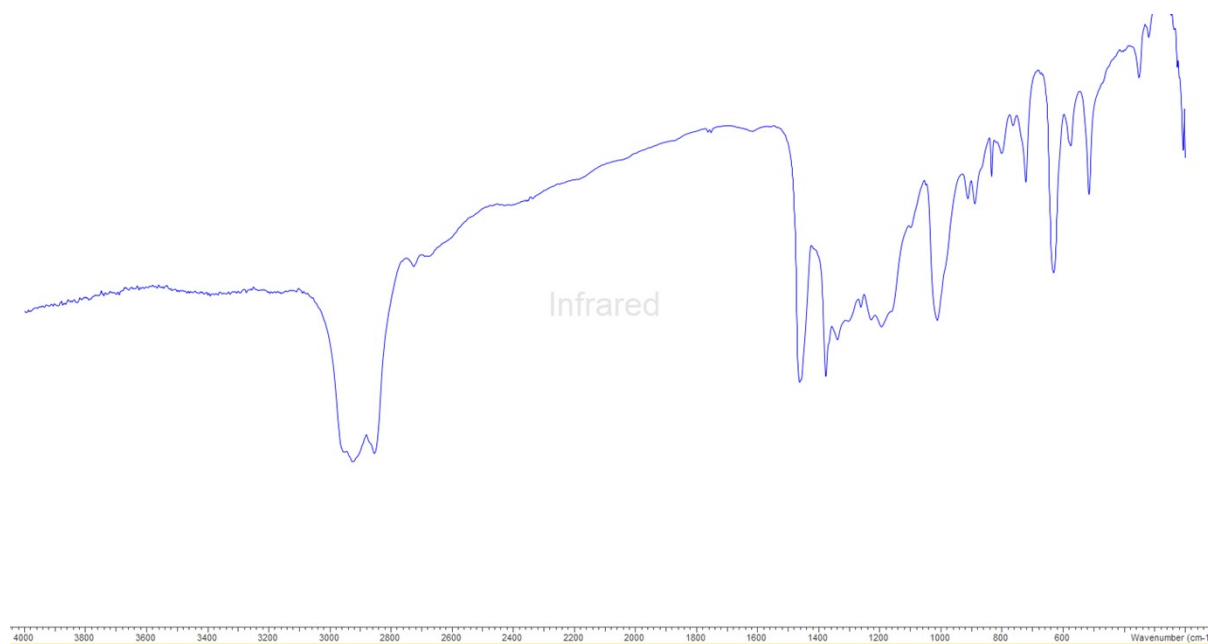

**Figure S7 - [Sn(OTf){P(CH<sub>2</sub>CH<sub>2</sub>PPh<sub>2</sub>)<sub>3</sub>][OTf]**

S7.1 – <sup>1</sup>H NMR spectrum (298 K, CD<sub>3</sub>CN)

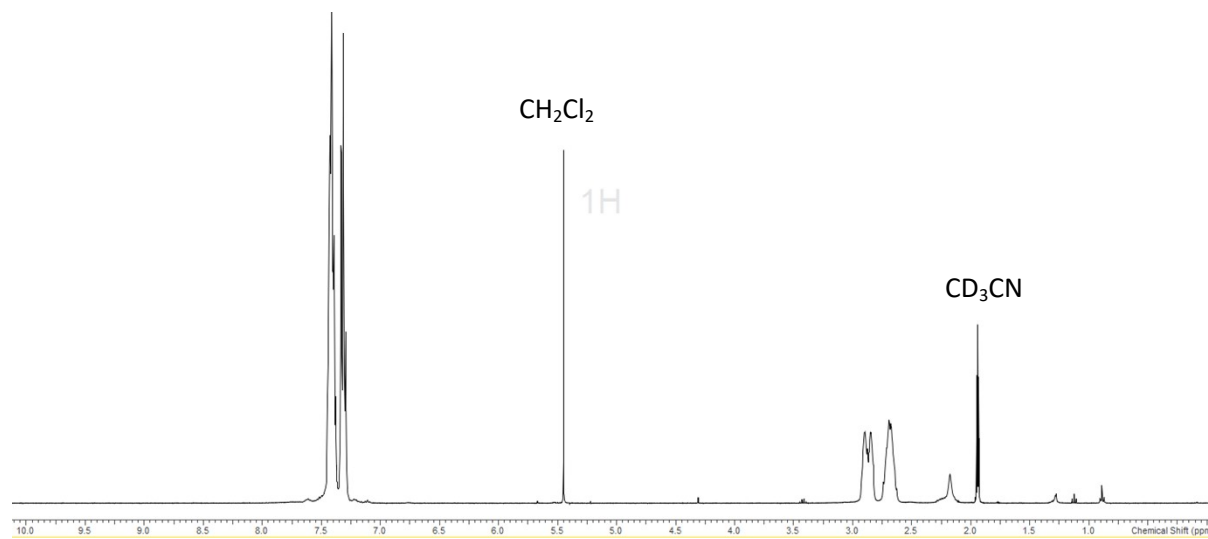

S7.2 – <sup>19</sup>F{<sup>1</sup>H} NMR spectrum (298 K, CD<sub>3</sub>CN)

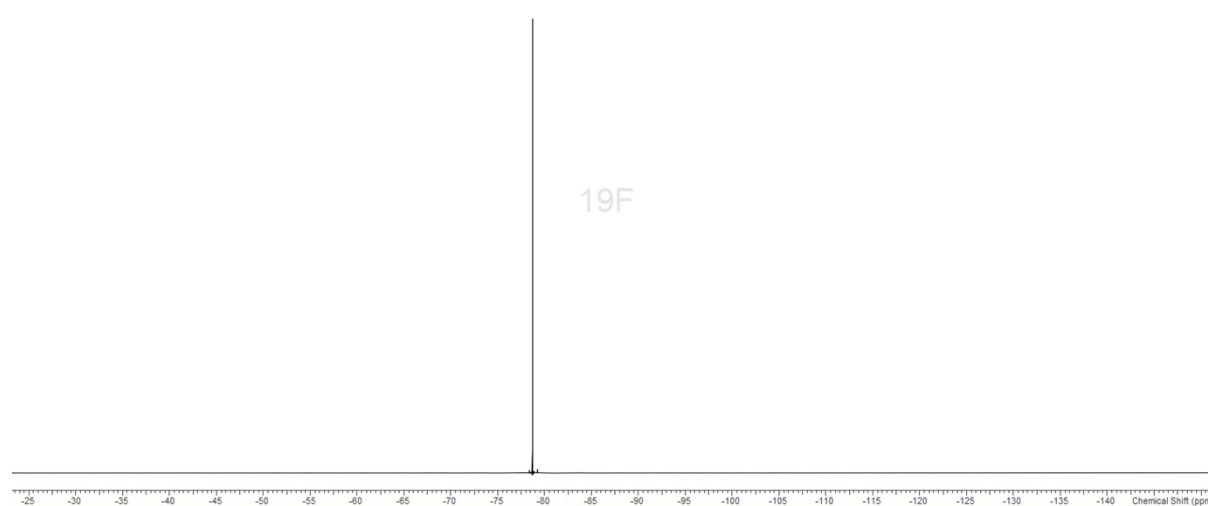

S7.3 –  $^{31}\text{P}\{^1\text{H}\}$  NMR spectrum (298 K,  $\text{CD}_3\text{CN}$ ) \* = minor hydrolysis product

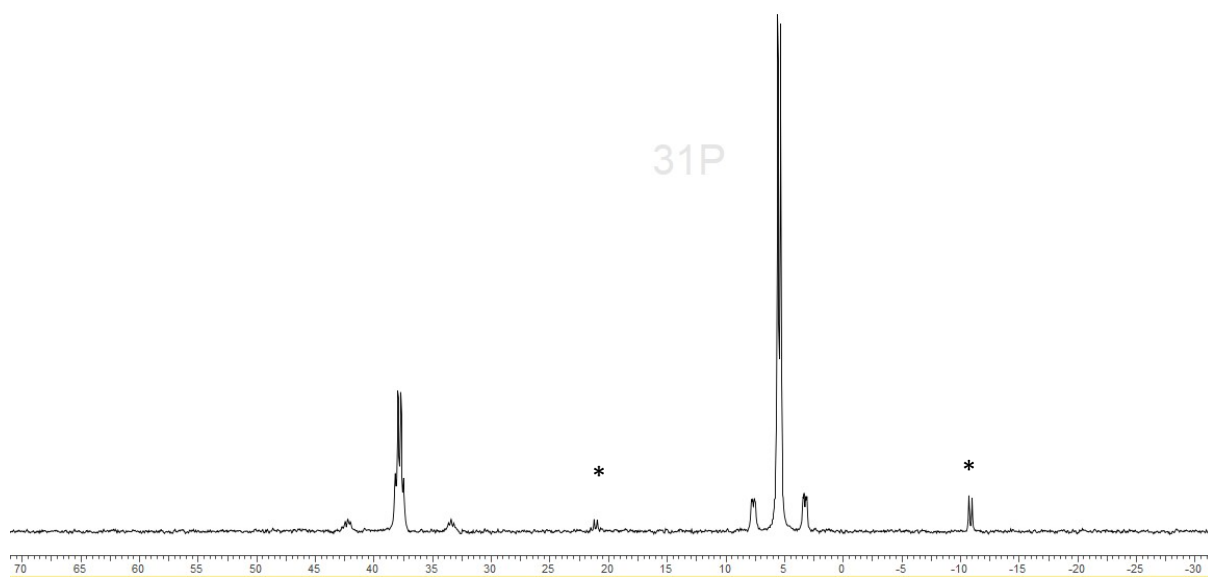

S7.4 –  $^{31}\text{P}\{^1\text{H}\}$  NMR spectrum (258 K,  $\text{CD}_3\text{CN}$ )

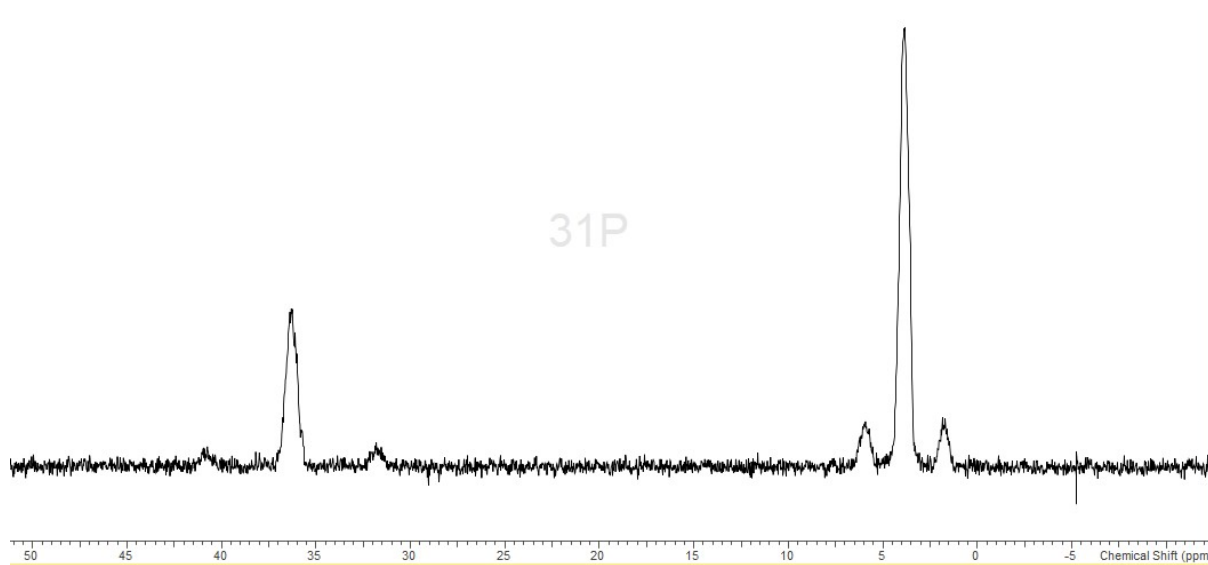



S7.5 –  $^{31}\text{P}\{^1\text{H}\}$  NMR spectrum (298 K,  $\text{CD}_2\text{Cl}_2$ )

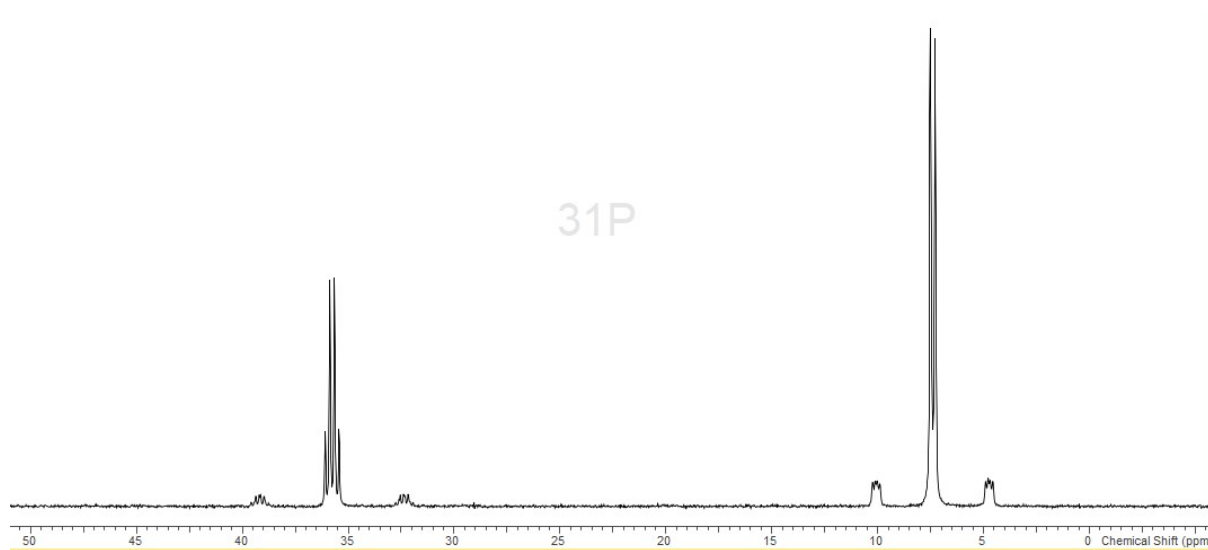

S7.6 –  $^{31}\text{P}\{^1\text{H}\}$  NMR spectrum (208 K,  $\text{CD}_2\text{Cl}_2$ ) \* = minor hydrolysis product

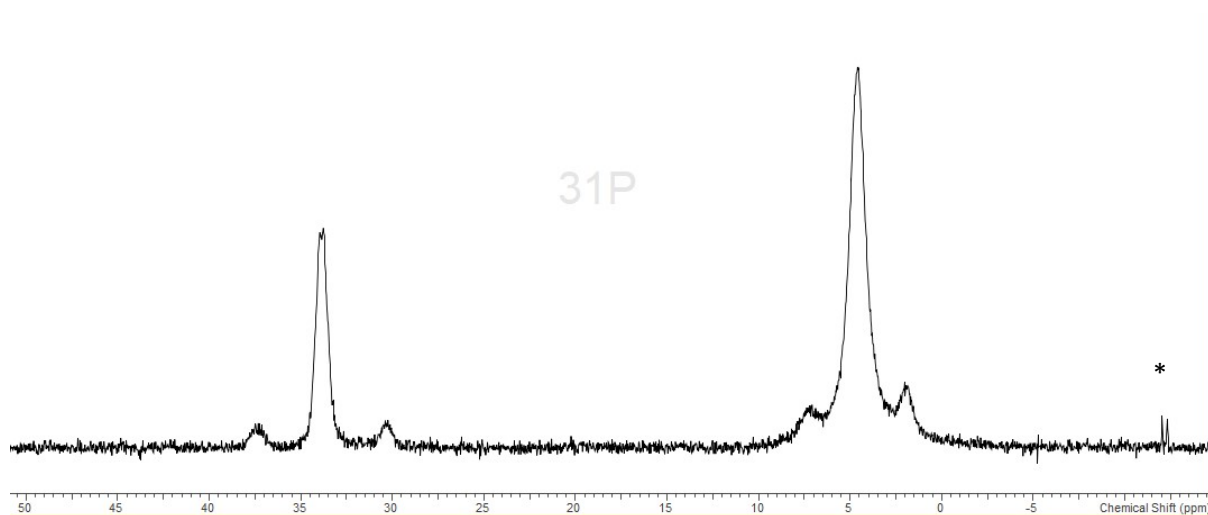

S7.7 –  $^{119}\text{Sn}$  NMR spectrum (298 K,  $\text{CD}_3\text{CN}$ )

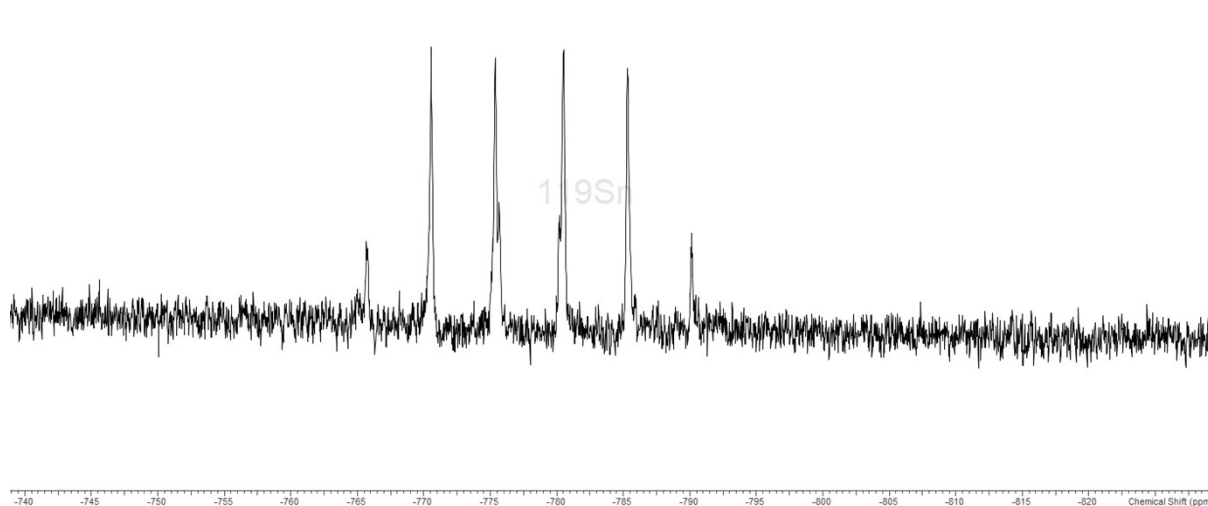

S7.8 –  $^{119}\text{Sn}$  NMR spectrum (258 K,  $\text{CD}_3\text{CN}$ )

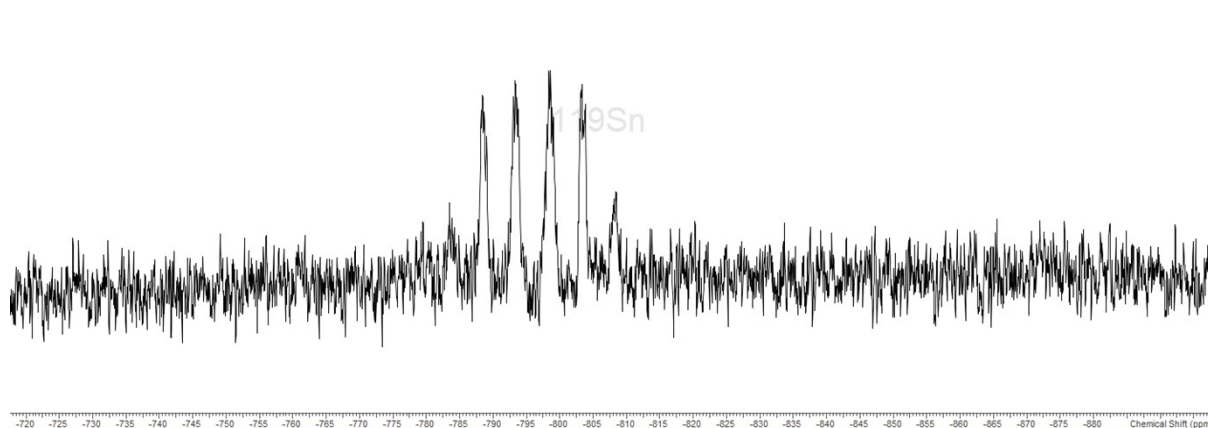

S7.9 – IR spectrum (Nujol)

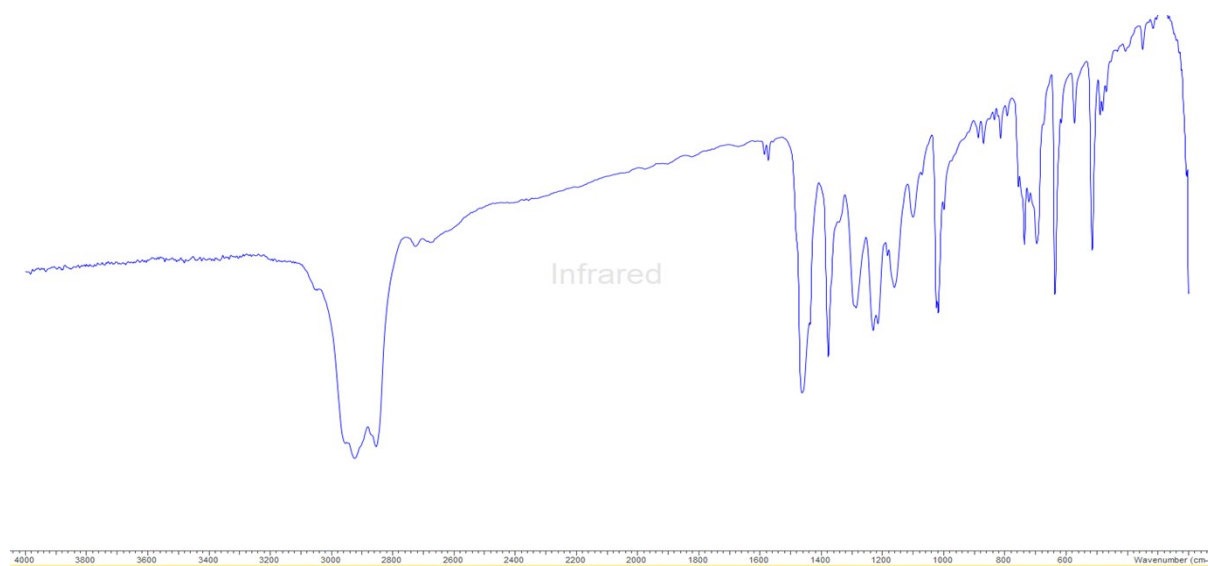

**Figure S8 – [Sn(OTf)<sub>2</sub>{*o*-C<sub>6</sub>H<sub>4</sub>(PPh<sub>2</sub>)<sub>2</sub>}**

S8.1 – <sup>1</sup>H NMR spectrum (298 K, CD<sub>3</sub>CN) CH<sub>2</sub>Cl<sub>2</sub>

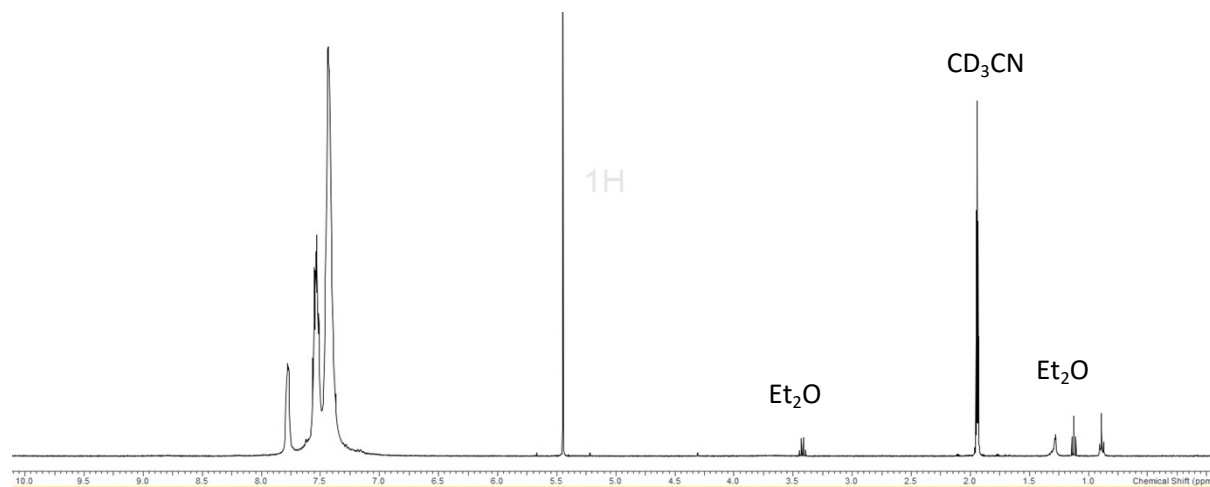

S8.2 – <sup>19</sup>F{<sup>1</sup>H} NMR spectrum (298 K, CD<sub>3</sub>CN)

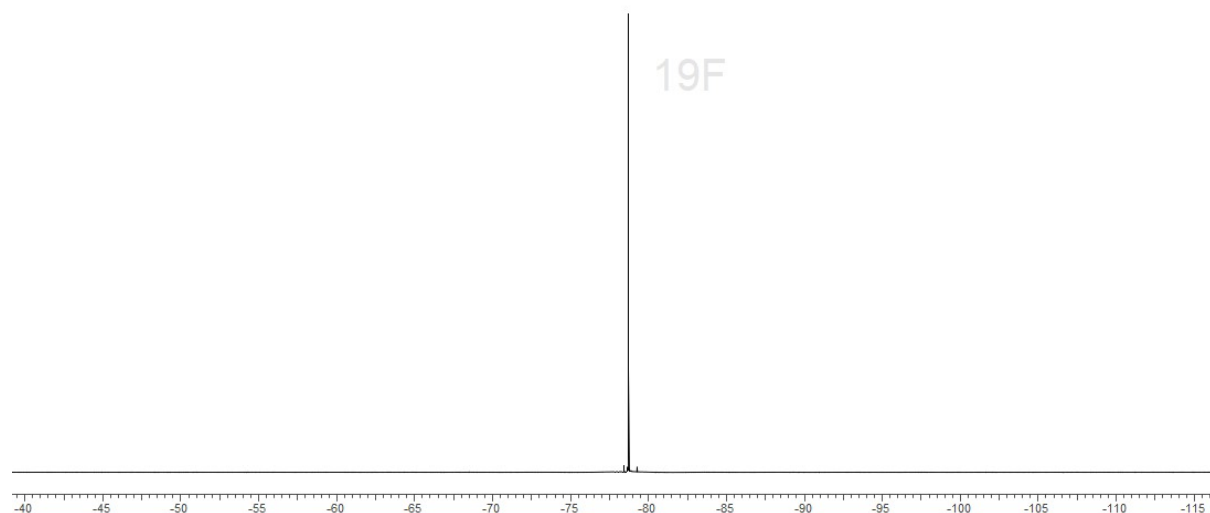

S8.3 –  $^{31}\text{P}\{^1\text{H}\}$  NMR spectrum (298 K,  $\text{CD}_3\text{CN}$ )

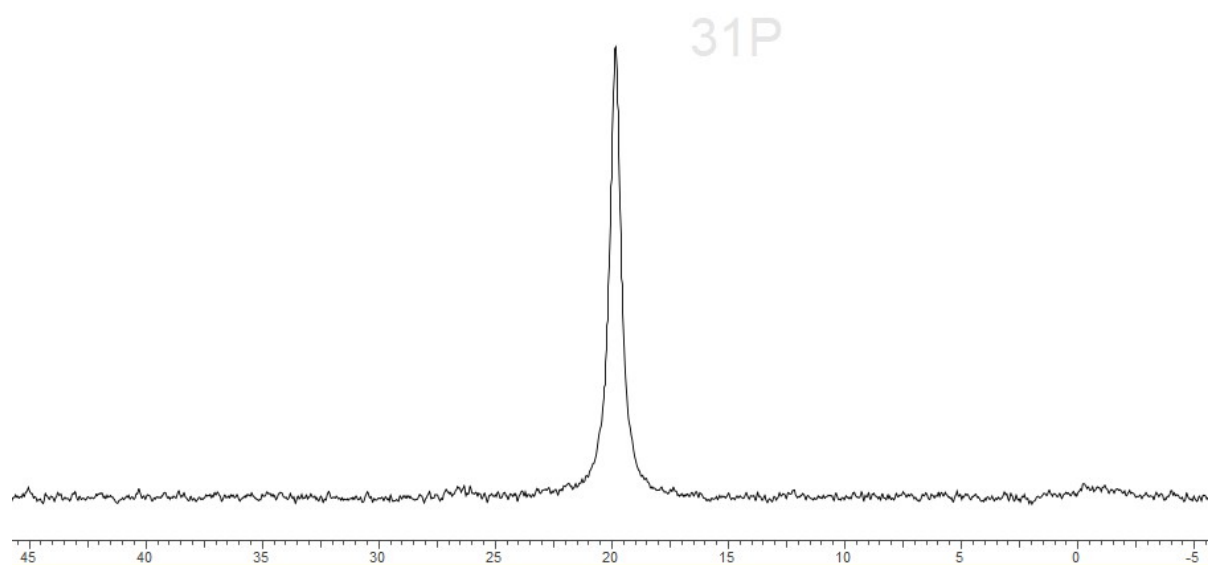

S8.4  $^{31}\text{P}\{^1\text{H}\}$  NMR spectrum (258 K,  $\text{CD}_3\text{CN}$ ) \* =  $o\text{-C}_6\text{H}_4(\text{PPh}_2\text{H})(\text{PPh}_2)]^+$  hydrolysis product

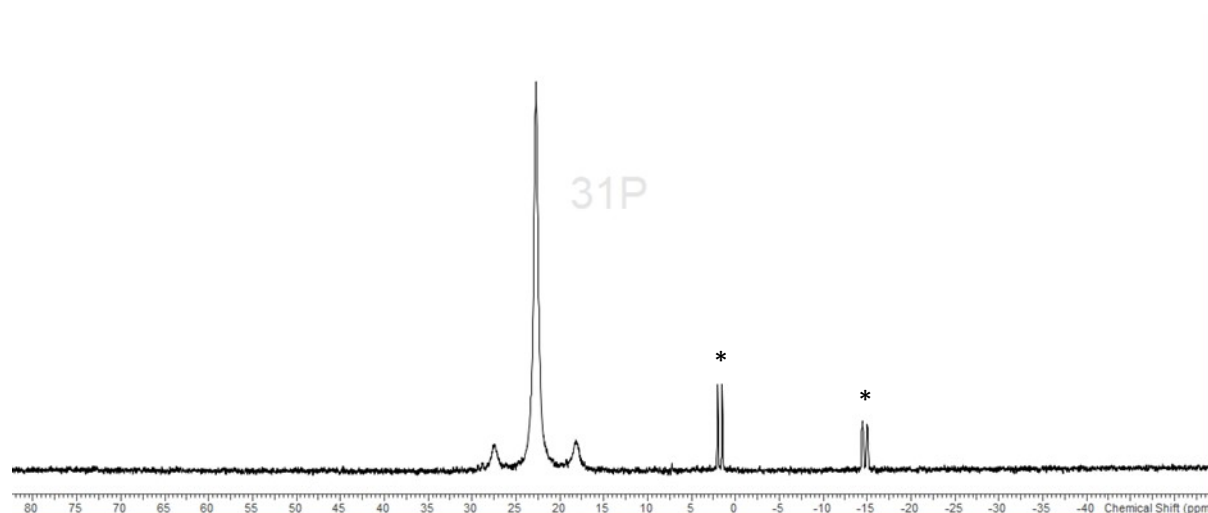

S8.5 –  $^{119}\text{Sn}$  NMR spectrum (298 K,  $\text{CD}_3\text{CN}$ )

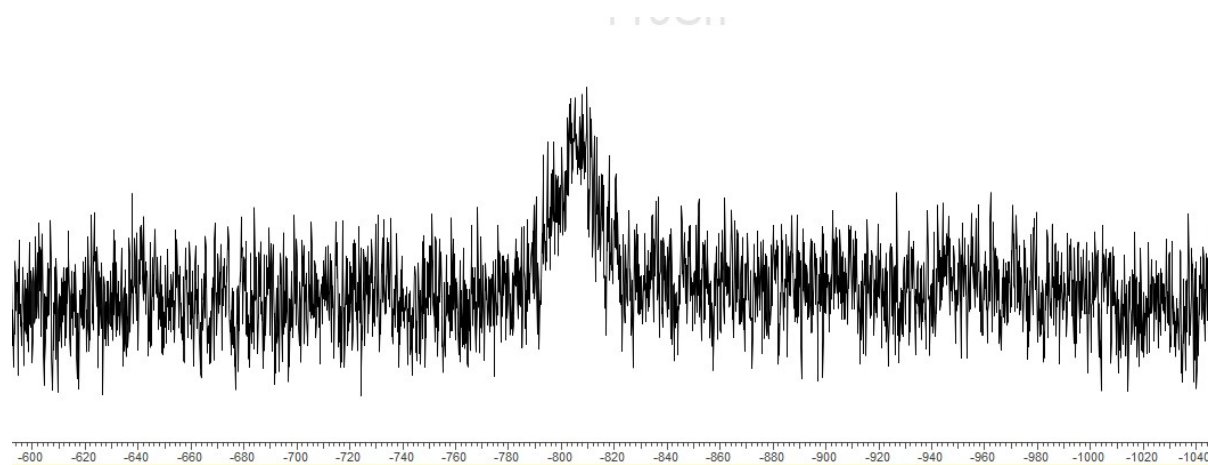

S8.6 –  $^{119}\text{Sn}$  NMR spectrum (258 K,  $\text{CD}_3\text{CN}$ ) (poorly soluble)

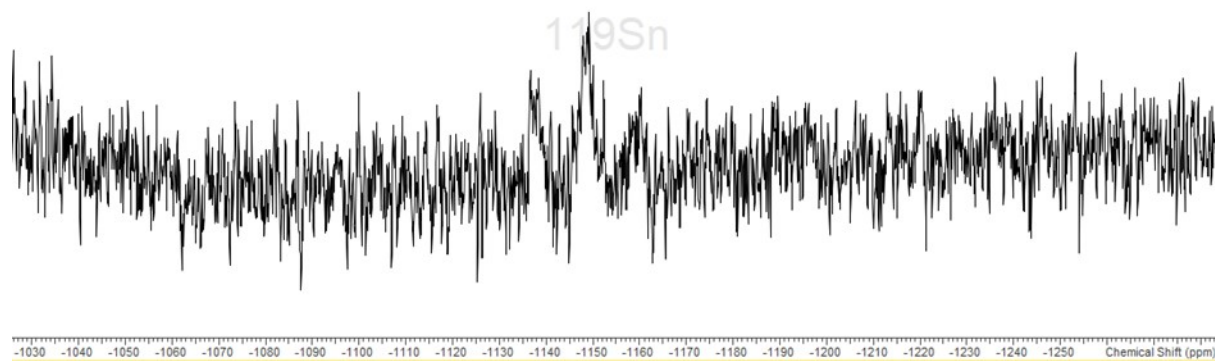

S8.7 – IR spectrum (Nujol)

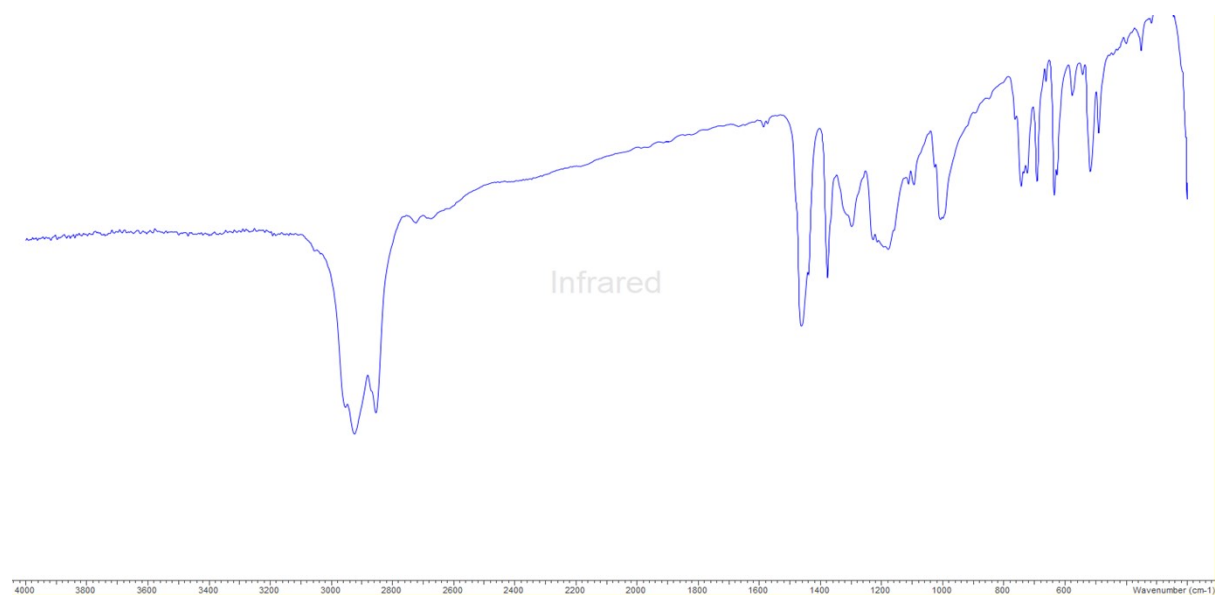

**Figure S9 – [Pb(OTf)<sub>2</sub>{*o*-C<sub>6</sub>H<sub>4</sub>(PMe<sub>2</sub>)<sub>2</sub>}**

S9.1 – <sup>1</sup>H NMR spectrum (298 K, CD<sub>3</sub>CN)

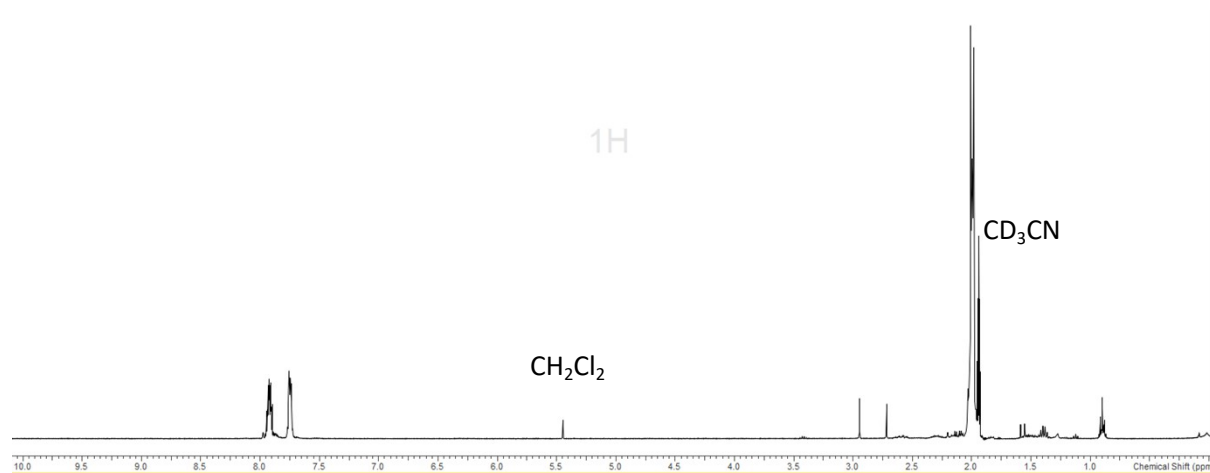

S9.2 – <sup>19</sup>F{<sup>1</sup>H} NMR spectrum (298 K, CD<sub>3</sub>CN)

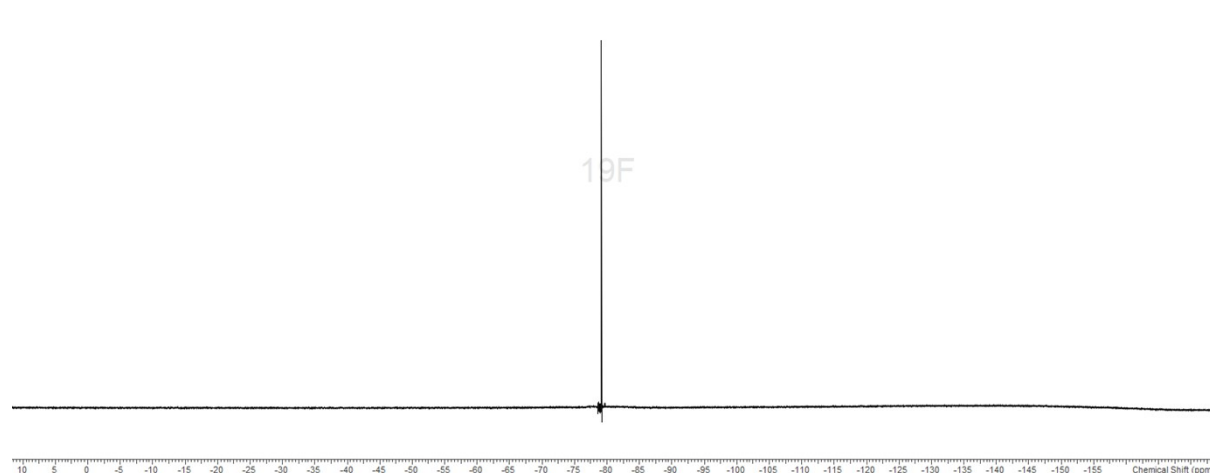

S9.3 –  $^{31}\text{P}\{^1\text{H}\}$  NMR spectrum (298 K,  $\text{CD}_3\text{CN}$ ) \* = unidentified impurity

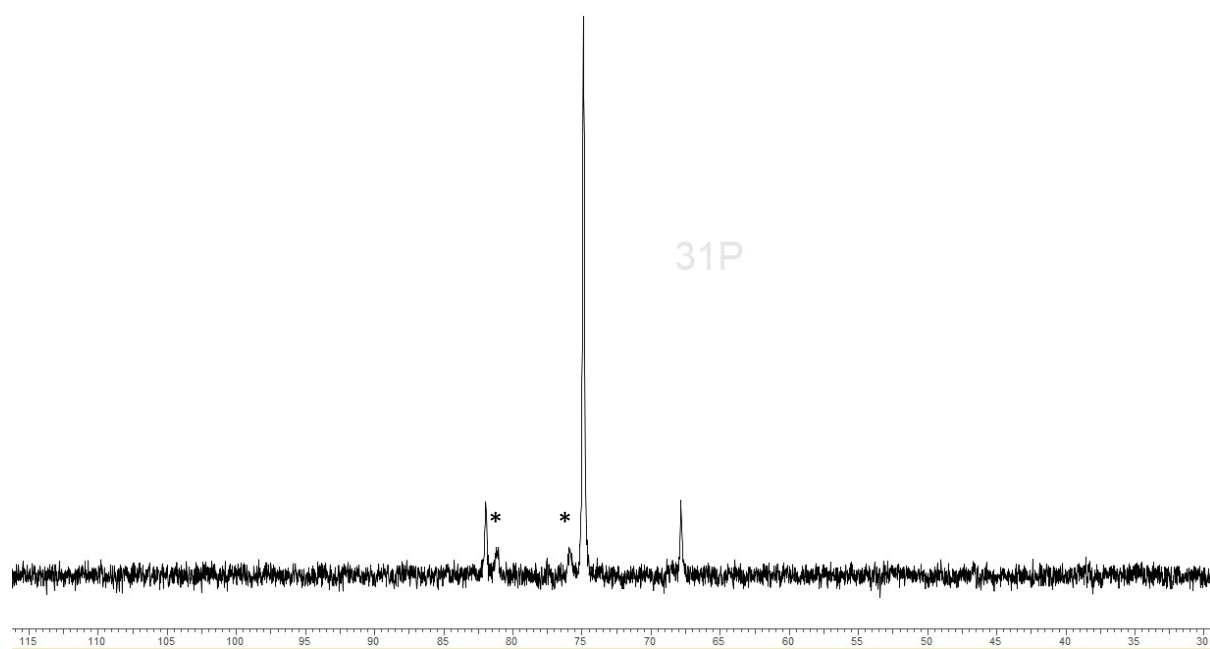

**Figure S10 – [Pb(OTf)<sub>2</sub>{*o*-C<sub>6</sub>H<sub>4</sub>(AsMe<sub>2</sub>)<sub>2</sub>}**

S10.1 – <sup>1</sup>H NMR spectrum (298 K, CD<sub>3</sub>CN)

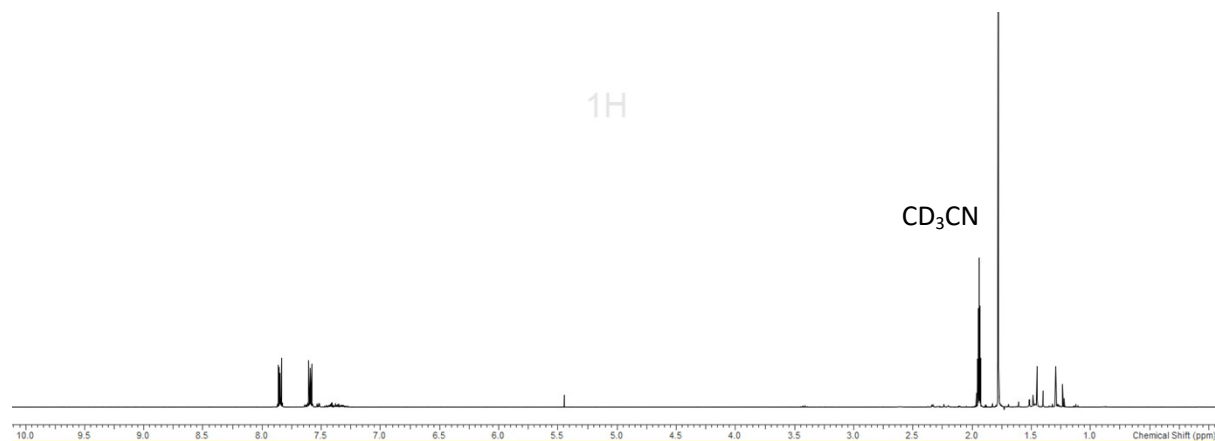



S10.2 –  $^{19}\text{F}\{^1\text{H}\}$  NMR spectrum (298 K,  $\text{CD}_3\text{CN}$ )

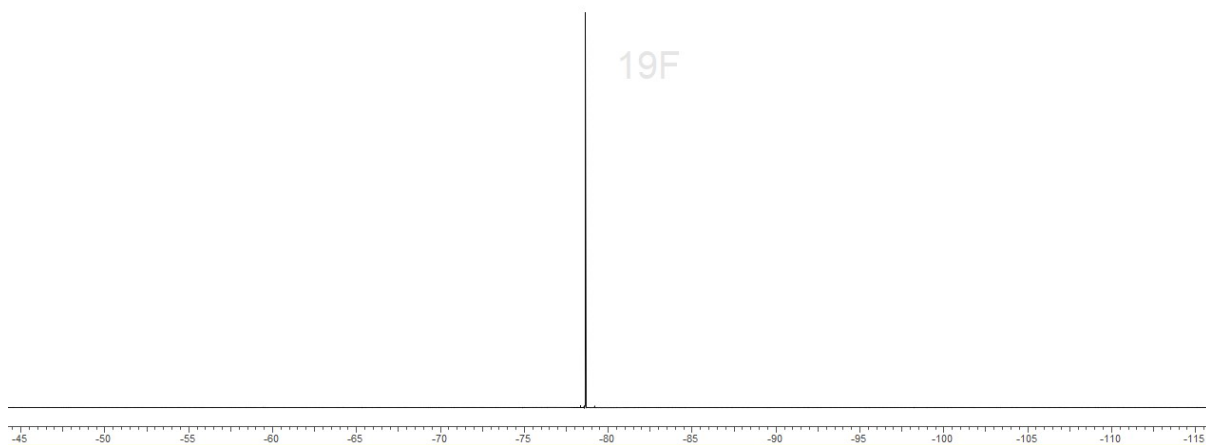

S10.3 – IR spectrum (Nujol)

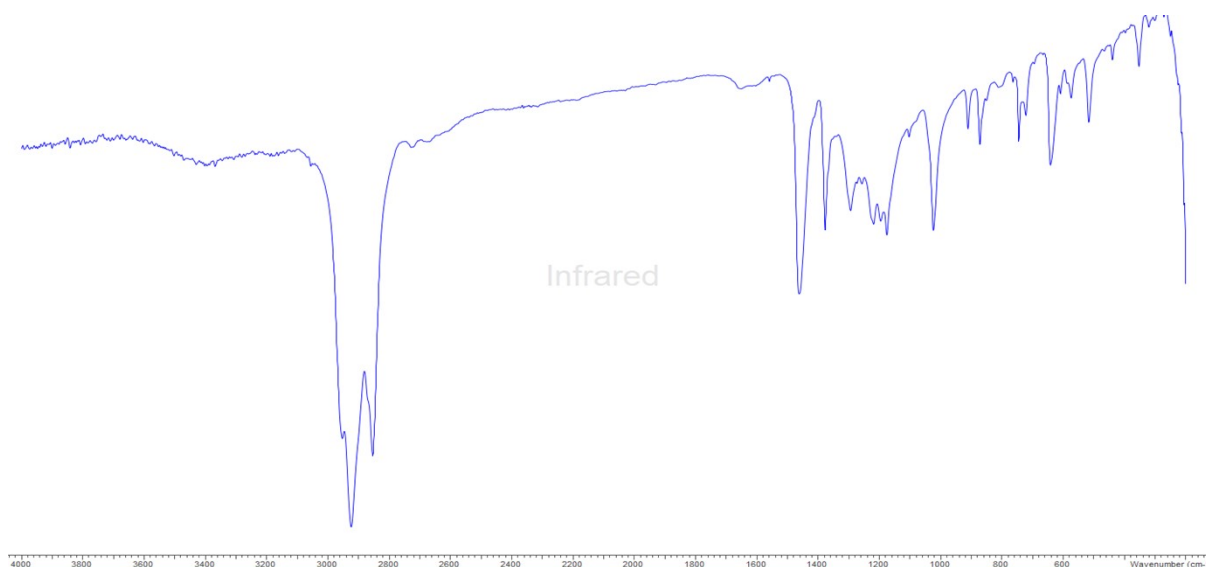

**Figure S11 – [Pb(OTf)<sub>2</sub>{MeC(CH<sub>2</sub>PPh<sub>2</sub>)<sub>3</sub>}**

S11.1 – <sup>1</sup>H NMR spectrum (298 K, CD<sub>3</sub>CN)

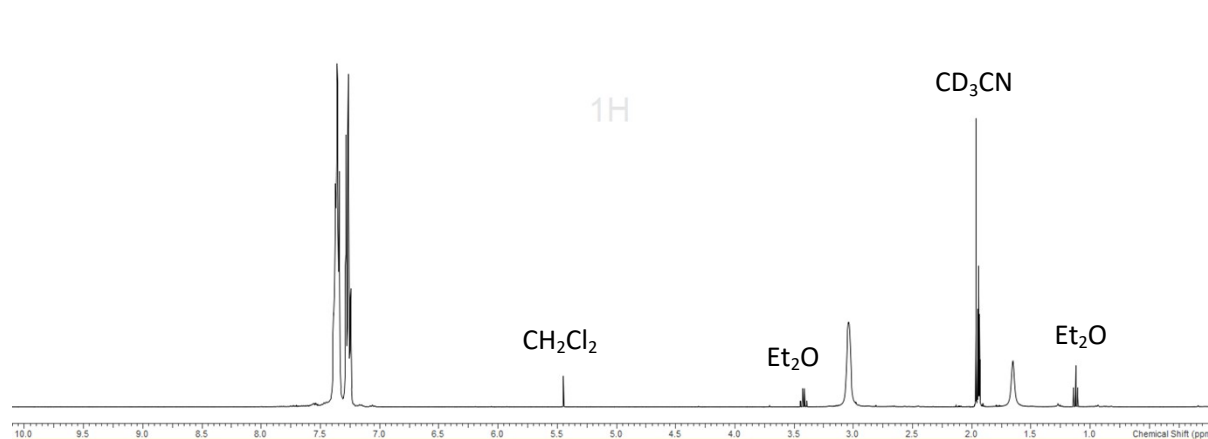

S11.2 – <sup>19</sup>F{<sup>1</sup>H} NMR spectrum (298 K, CD<sub>3</sub>CN)

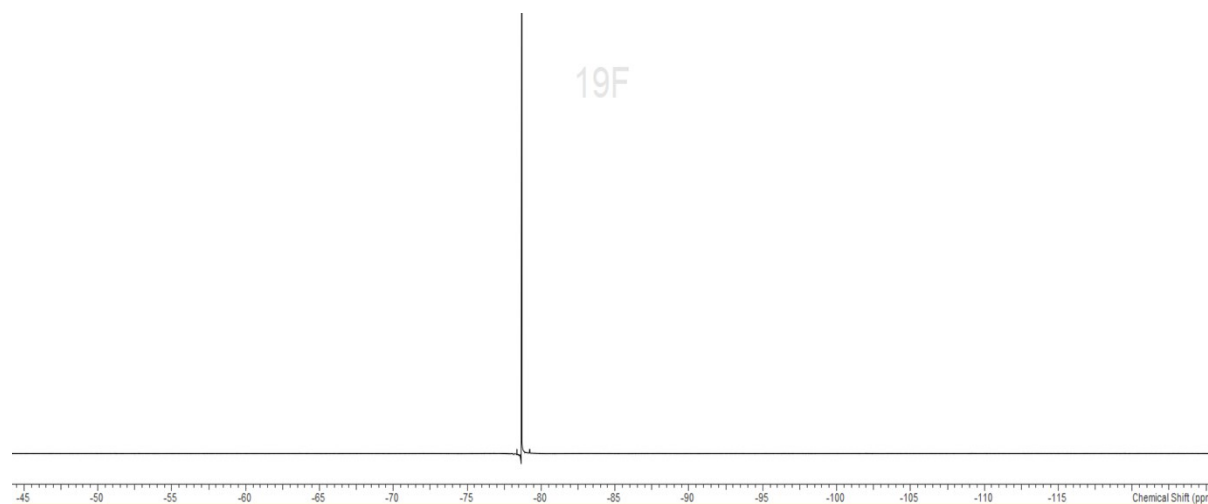

S11.3 – <sup>31</sup>P{<sup>1</sup>H} NMR spectrum (298 K, CD<sub>3</sub>CN)

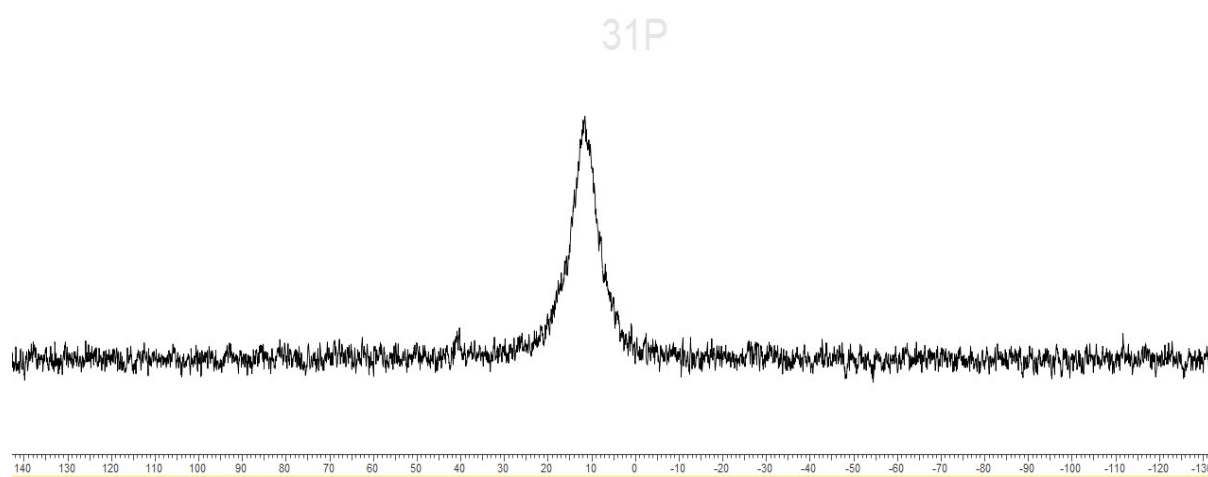

S11.4  $^{31}\text{P}\{^1\text{H}\}$  NMR spectrum (258 K,  $\text{CD}_3\text{CN}$ )

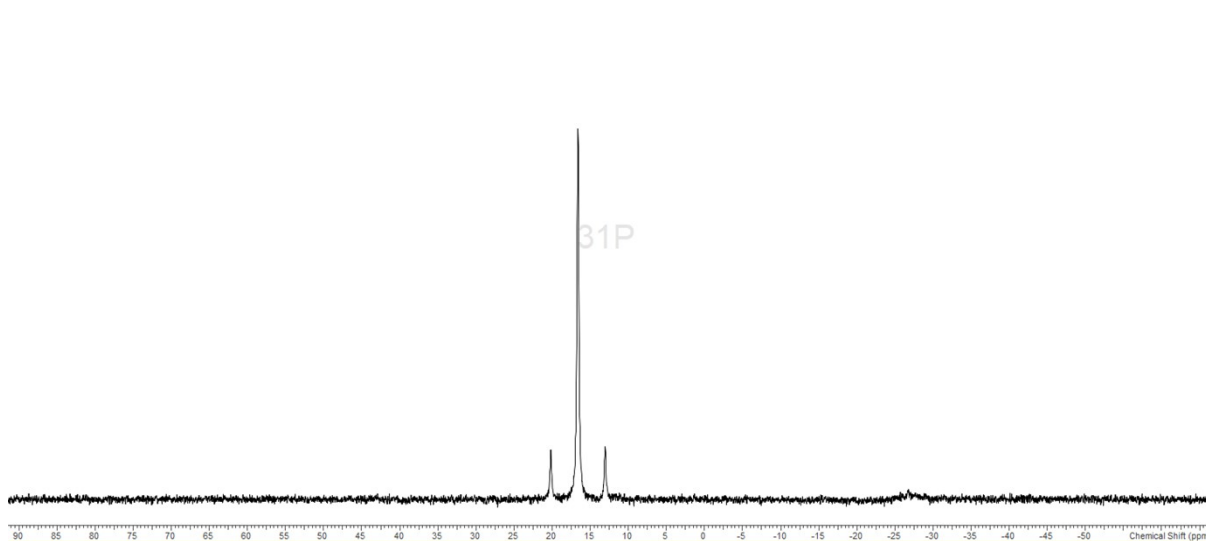

S11.5 – IR spectrum (Nujol)

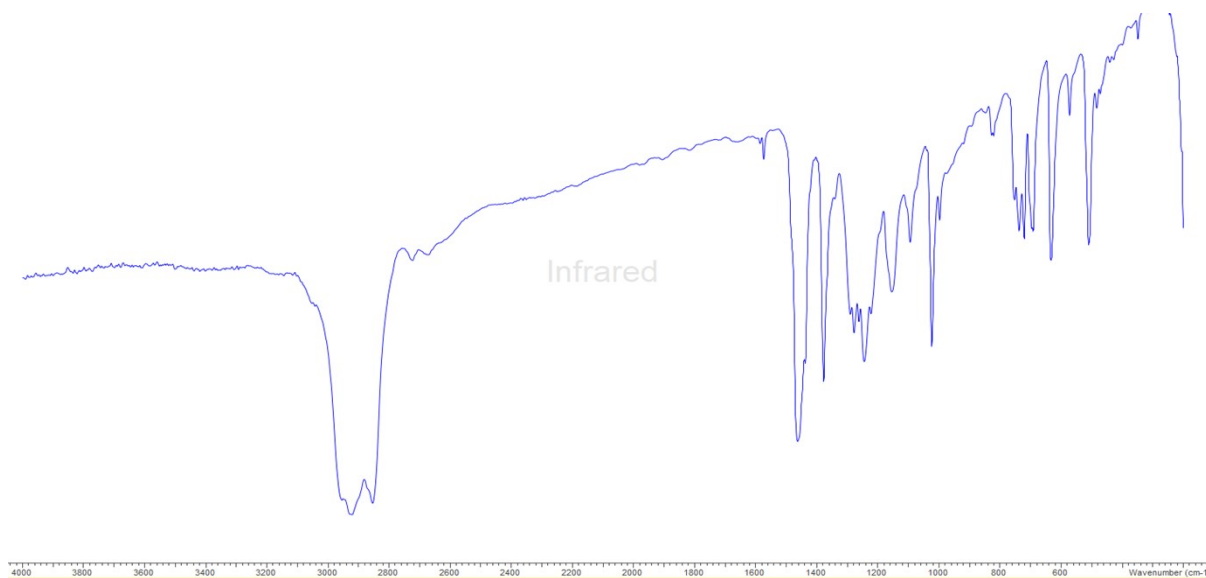

Figure S12 –  $[\text{Pb}\{\text{MeC}(\text{CH}_2\text{PPh}_2)_3\}][\text{BAR}^{\text{F}}]_2$

S12.1–  $^1\text{H}$  NMR spectrum (298 K,  $\text{CD}_3\text{CN}$ )

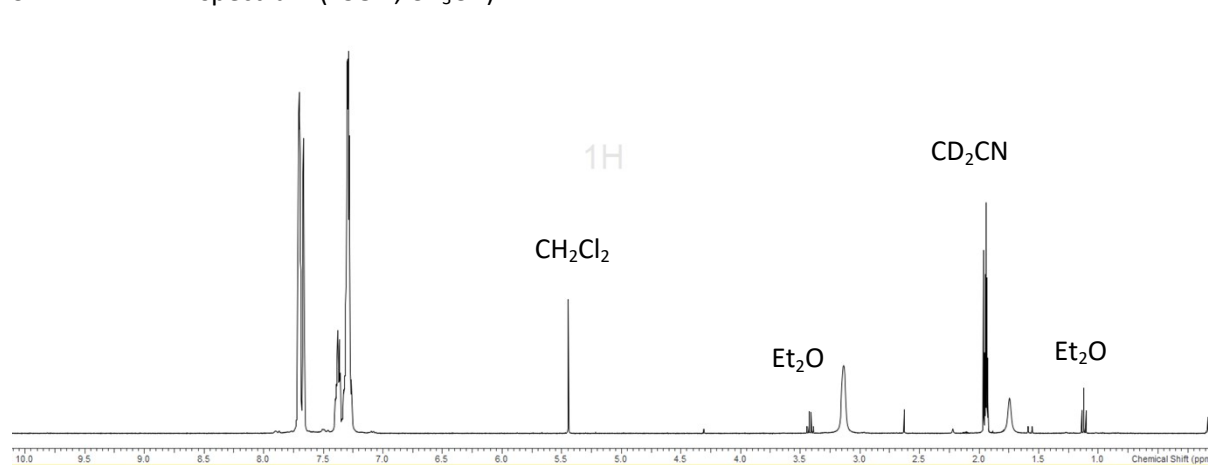

S12.2 –  $^{19}\text{F}\{^1\text{H}\}$  NMR spectrum (298 K,  $\text{CD}_3\text{CN}$ )

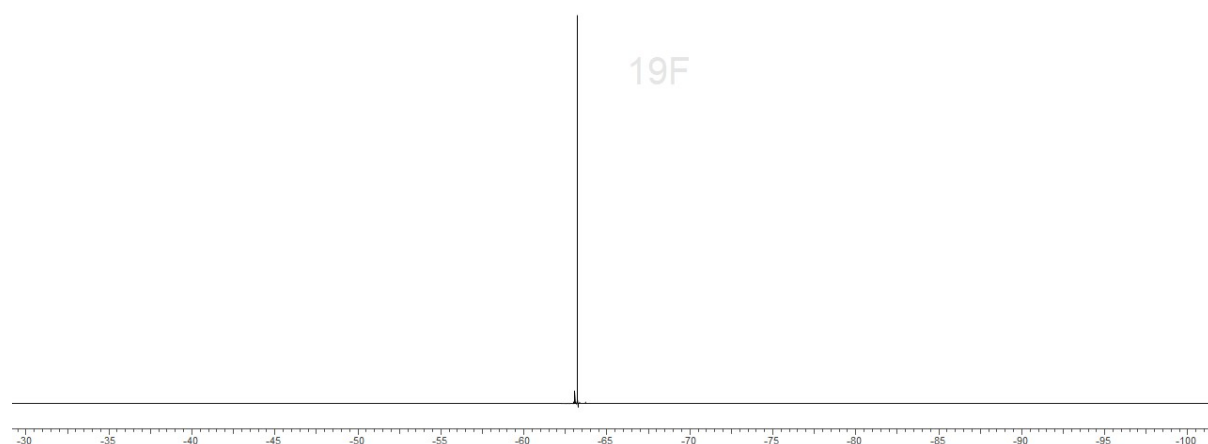

S12.3 –  $^{31}\text{P}\{^1\text{H}\}$  NMR spectrum (298 K,  $\text{CD}_3\text{CN}$ )

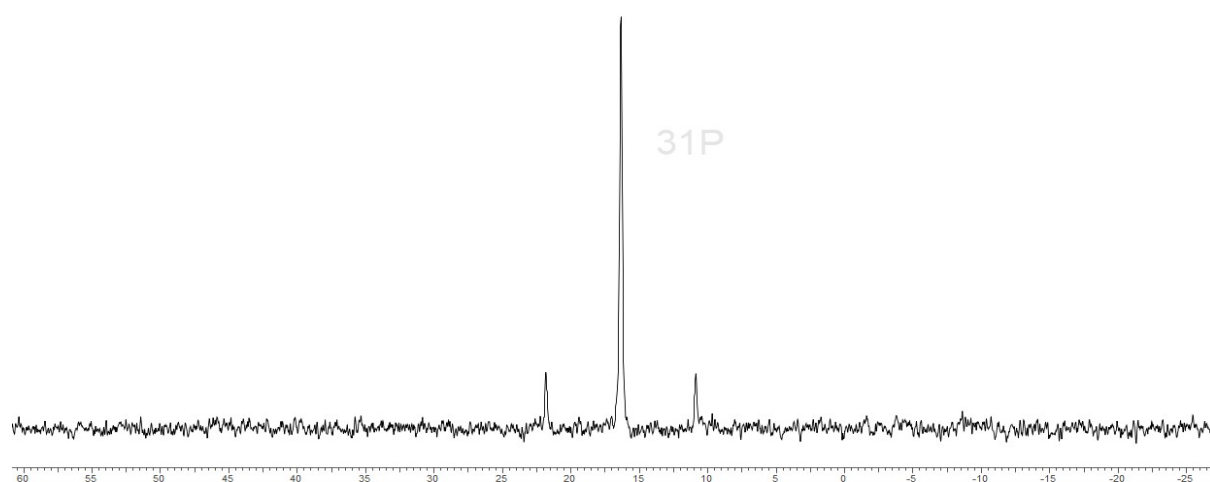

S12.4 IR spectrum (Nujol)

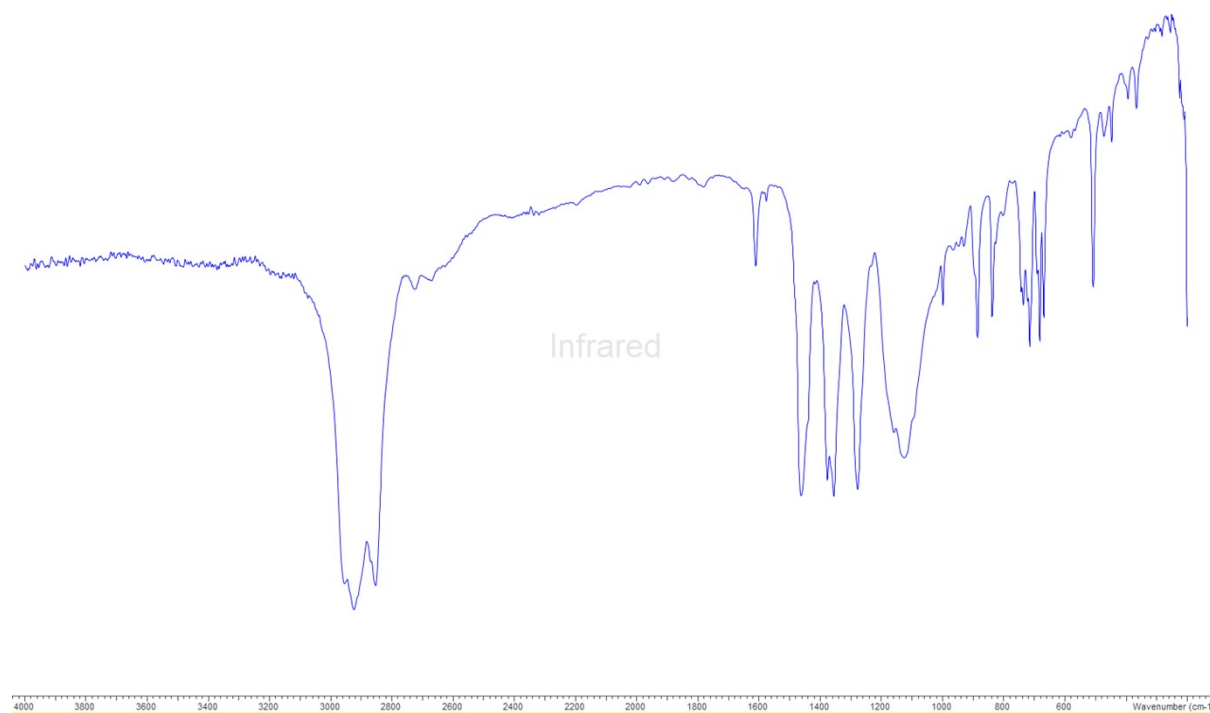

**Figure S13 – [Pb(OTf)<sub>2</sub>{MeC(CH<sub>2</sub>AsMe<sub>2</sub>)<sub>3</sub>}**

S13.1 – <sup>1</sup>H NMR spectrum (298 K, CD<sub>3</sub>CN)

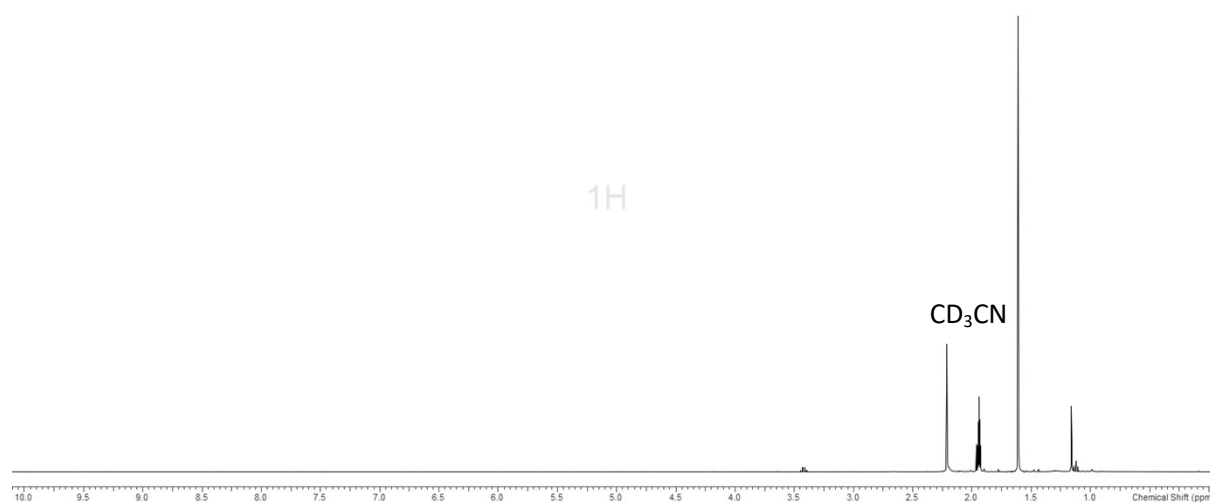

S13.2 – <sup>19</sup>F{<sup>1</sup>H} NMR spectrum (298 K, CD<sub>3</sub>CN)

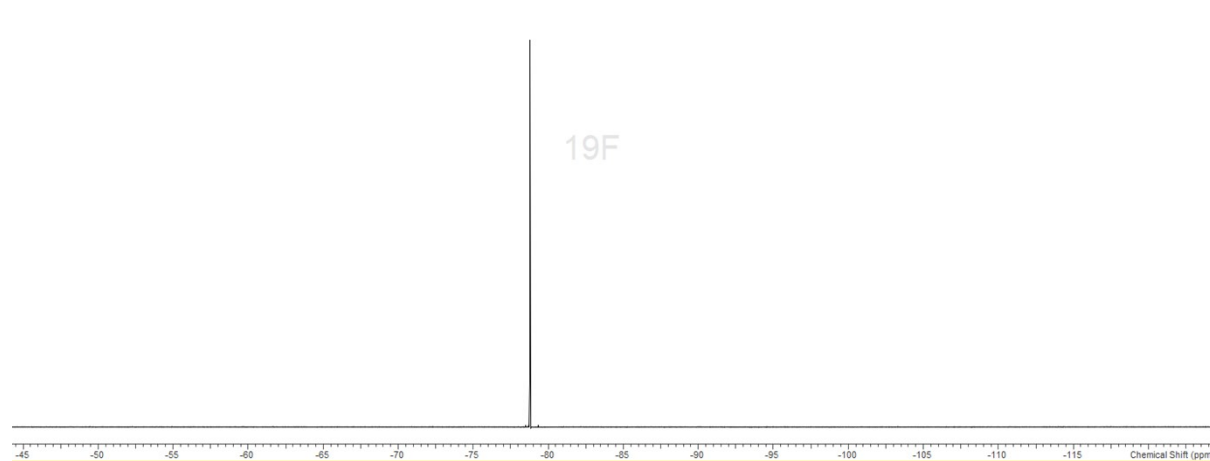

Figure S14 – [Pb(OTf){P(CH<sub>2</sub>CH<sub>2</sub>PPh<sub>2</sub>)<sub>3</sub>}] [OTf]

S14.1 – <sup>1</sup>H NMR spectrum (298 K, CD<sub>3</sub>CN)

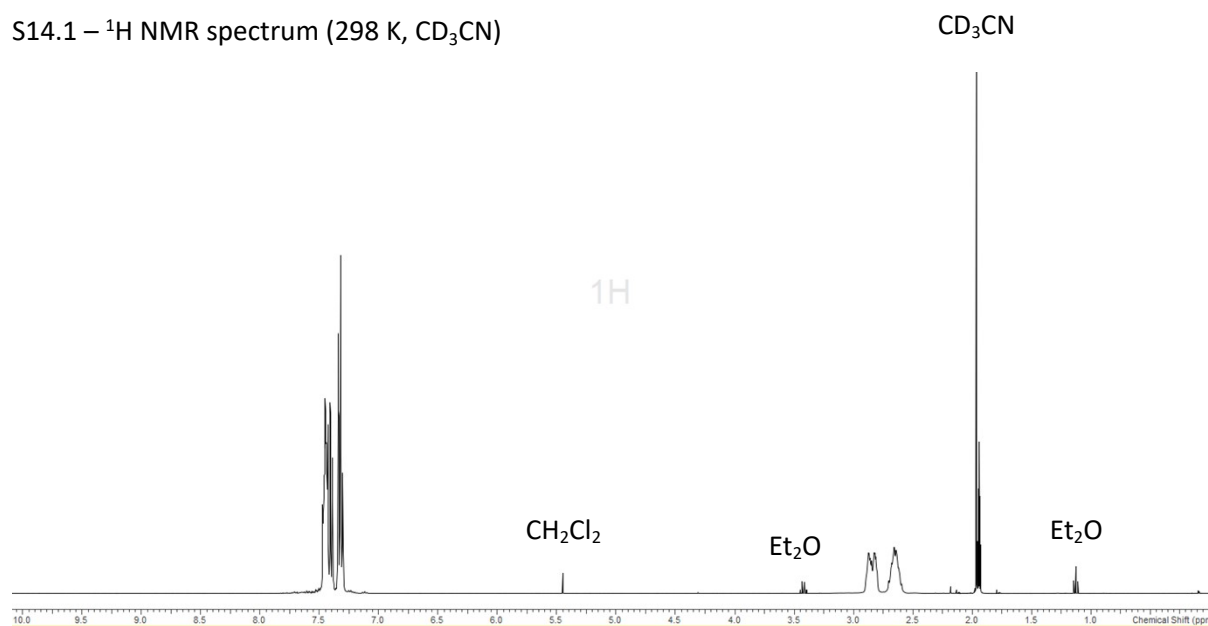

S14.2 – <sup>19</sup>F{<sup>1</sup>H} NMR spectrum (298 K, CD<sub>3</sub>CN)

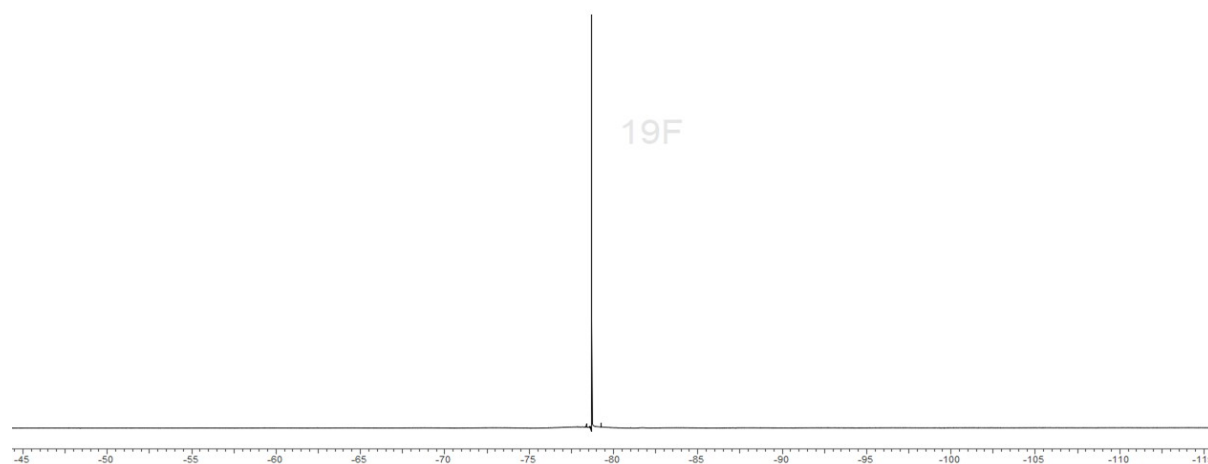

S14.3 –  $^{31}\text{P}\{^1\text{H}\}$  NMR spectrum (298 K,  $\text{CD}_3\text{CN}$ )

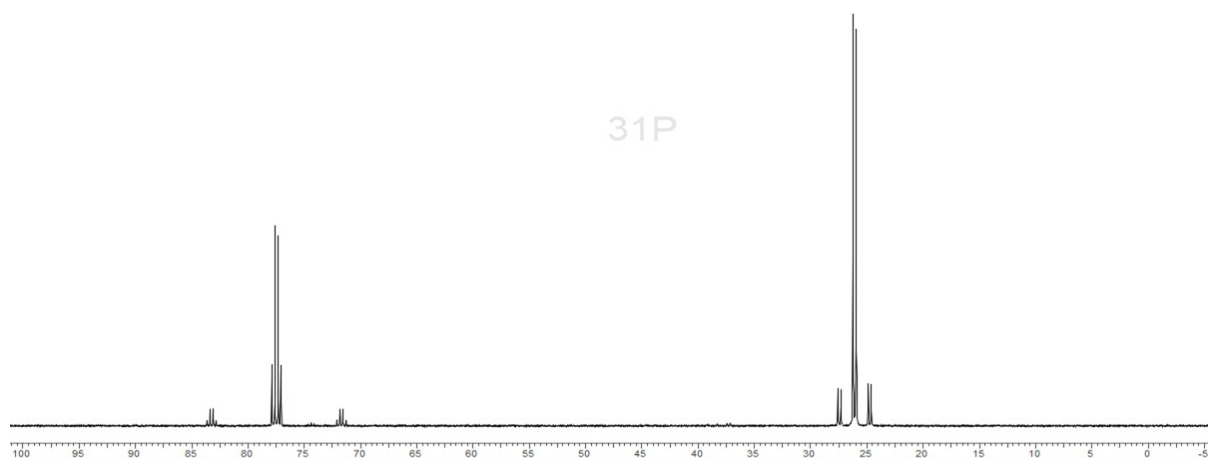

S14.4 – IR spectrum (Nujol)

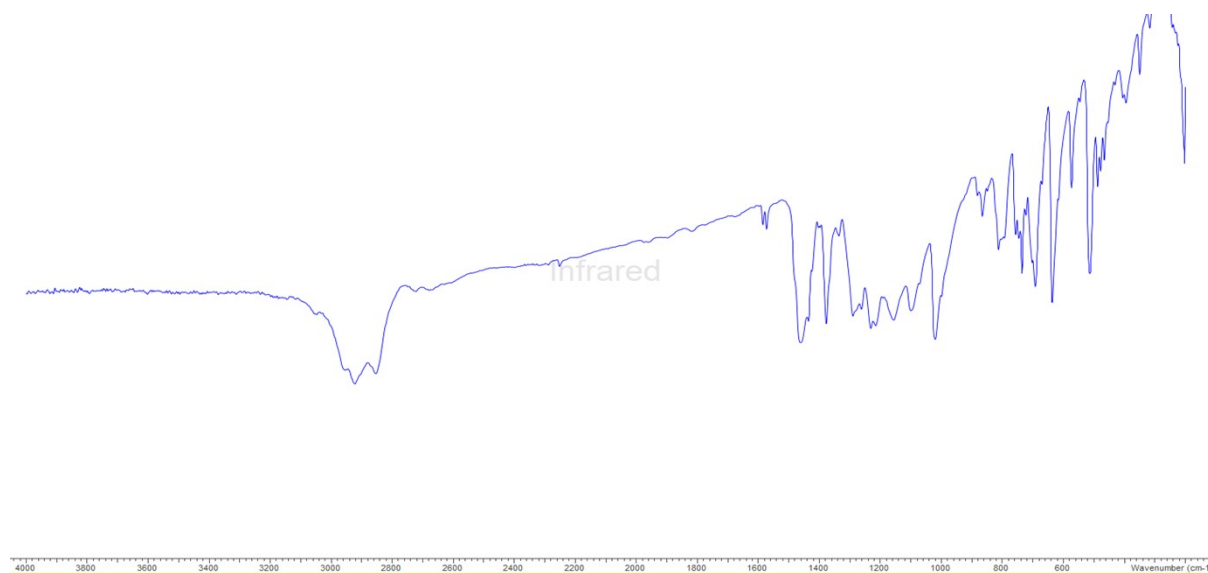



**Figure S15 – [Ge{MeC(CH<sub>2</sub>PPh<sub>2</sub>)<sub>3</sub>}][BAr<sup>F</sup>]<sub>2</sub>**

S15.1 – <sup>1</sup>H NMR spectrum (298 K, CD<sub>2</sub>Cl<sub>2</sub>)

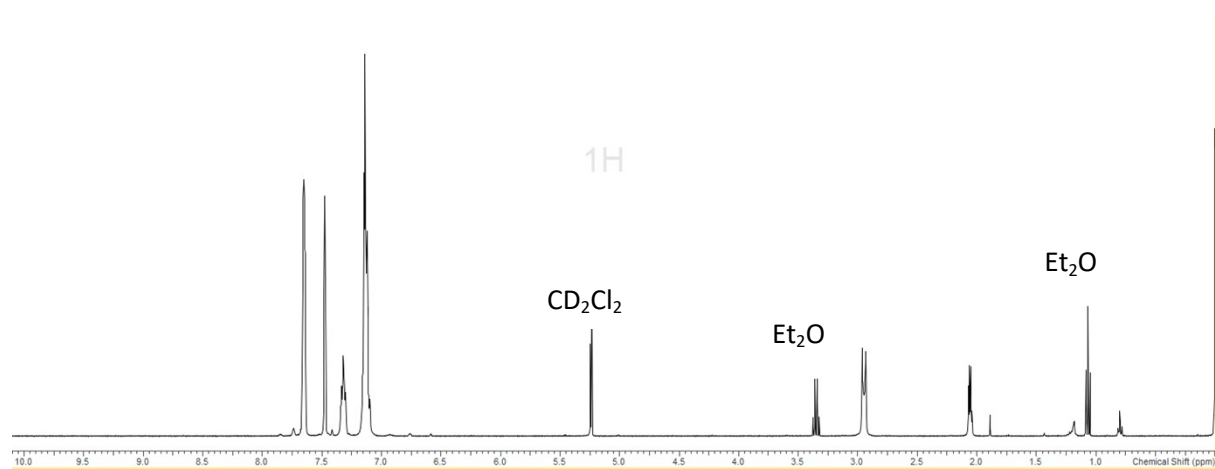

S15.2 – <sup>19</sup>F{<sup>1</sup>H} NMR spectrum (298 K, CD<sub>2</sub>Cl<sub>2</sub>)

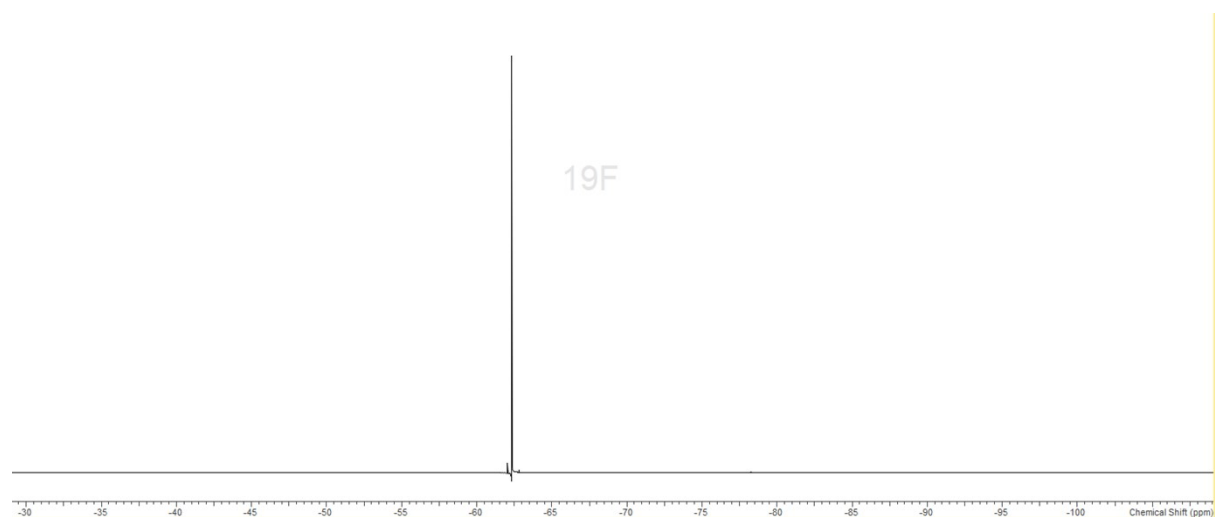

S15.3 -  $^{31}\text{P}\{^1\text{H}\}$  NMR spectrum (298 K,  $\text{CD}_2\text{Cl}_2$ )

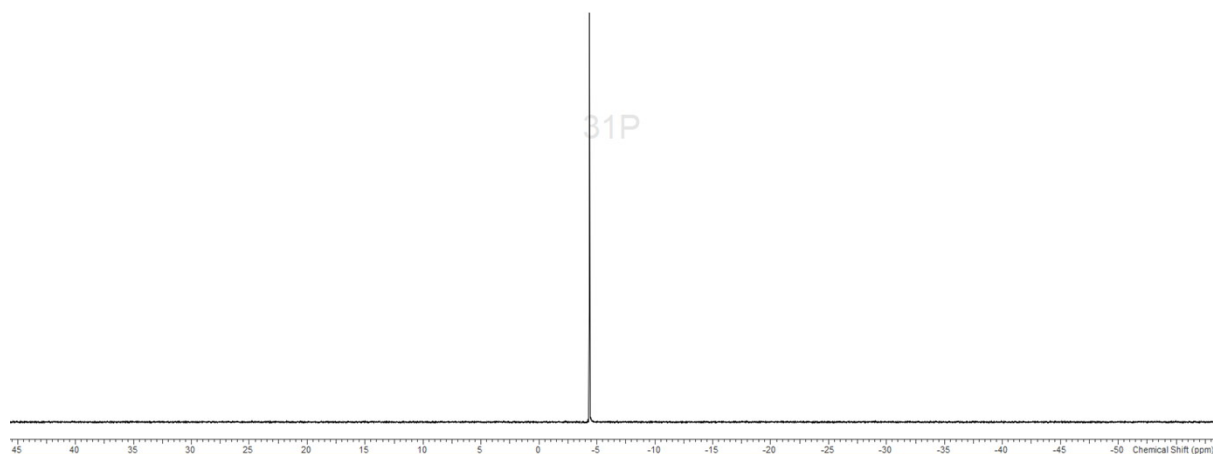

Figure S16 –  $\text{Sn}(\text{OTf})_2$

S16.1 – IR spectrum (Nujol)

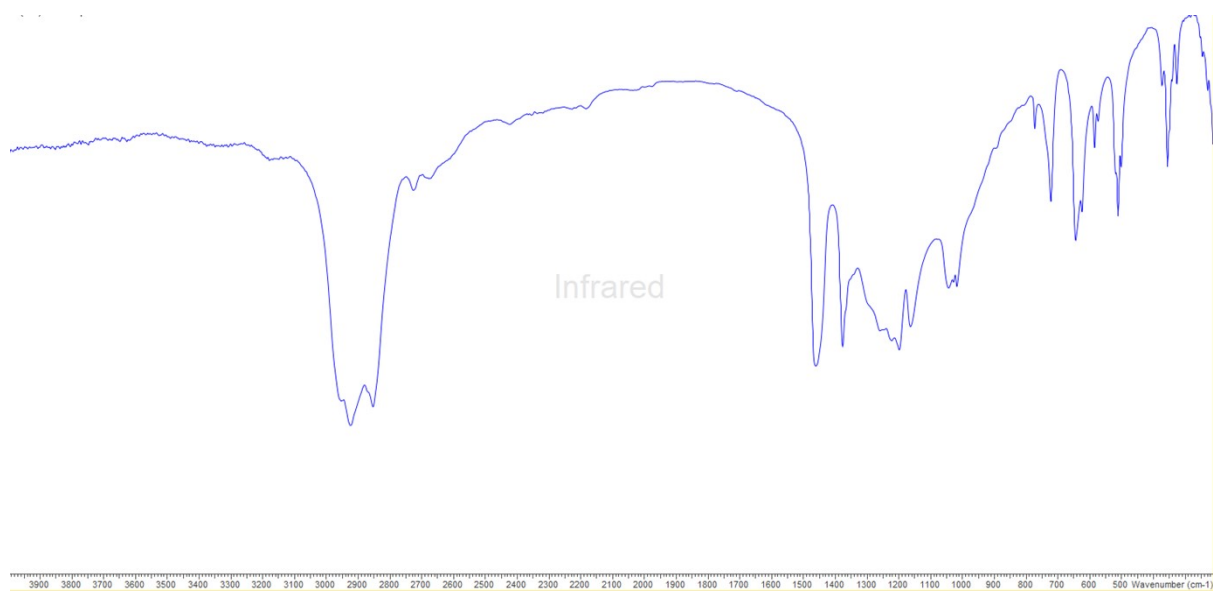

**Figure S17 – Pb(OTf)<sub>2</sub>**

**S17.1 - IR spectrum (Nujol)**

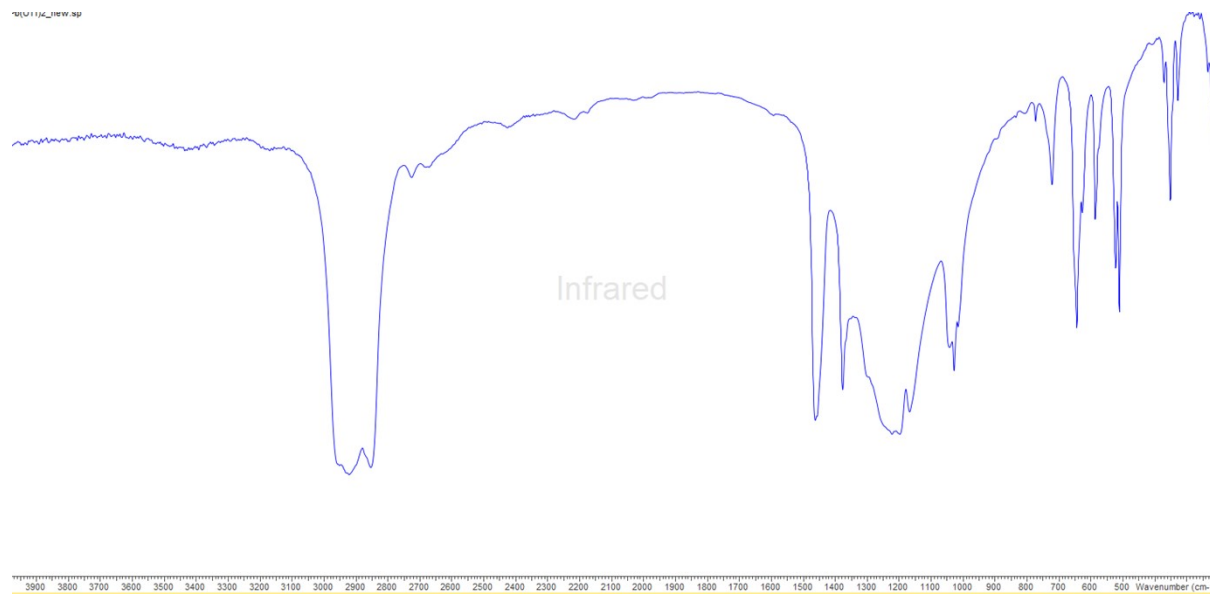

**Table S1 - X-ray crystallographic parameters<sup>a</sup>**

| Complex                                                                                   | [Sn(OTf) <sub>2</sub> {o-C <sub>6</sub> H <sub>4</sub> (PMe <sub>2</sub> ) <sub>2</sub> }]                    | [Sn(OTf) <sub>2</sub> {o-C <sub>6</sub> H <sub>4</sub> (AsMe <sub>2</sub> ) <sub>2</sub> }]     | [Sn(OTf){PhP(CH <sub>2</sub> CH <sub>2</sub> PPh <sub>2</sub> ) <sub>2</sub> }] [OTf] · Et <sub>2</sub> O * |
|-------------------------------------------------------------------------------------------|---------------------------------------------------------------------------------------------------------------|-------------------------------------------------------------------------------------------------|-------------------------------------------------------------------------------------------------------------|
| Formula                                                                                   | C <sub>36</sub> H <sub>48</sub> F <sub>18</sub> O <sub>18</sub> P <sub>6</sub> S <sub>6</sub> Sn <sub>3</sub> | C <sub>12</sub> H <sub>16</sub> As <sub>2</sub> F <sub>6</sub> O <sub>6</sub> S <sub>2</sub> Sn | C <sub>40</sub> H <sub>43</sub> F <sub>6</sub> O <sub>7</sub> P <sub>3</sub> S <sub>2</sub> Sn              |
| <i>M</i>                                                                                  | 2215.59                                                                                                       | 702.92                                                                                          | 1025.46                                                                                                     |
| Crystal system                                                                            | orthorhombic                                                                                                  | monoclinic                                                                                      | monoclinic                                                                                                  |
| Space group (no.)                                                                         | Pnna (52)                                                                                                     | C2/c (15)                                                                                       | P2 <sub>1</sub> /n (14)                                                                                     |
| <i>a</i> /Å                                                                               | 16.2539(3)                                                                                                    | 15.8316(5)                                                                                      | 15.8064(5)                                                                                                  |
| <i>b</i> /Å                                                                               | 24.0871(5)                                                                                                    | 14.0437(4)                                                                                      | 10.1469(2)                                                                                                  |
| <i>c</i> /Å                                                                               | 20.0157(5)                                                                                                    | 9.7168(3)                                                                                       | 27.2193(6)                                                                                                  |
| $\alpha$ /°                                                                               | 90                                                                                                            | 90                                                                                              | 90                                                                                                          |
| $\beta$ /°                                                                                | 90                                                                                                            | 95.863(3)                                                                                       | 91.081(2)                                                                                                   |
| $\gamma$ /°                                                                               | 90                                                                                                            | 90                                                                                              | 90                                                                                                          |
| <i>U</i> /Å <sup>3</sup>                                                                  | 7836.3(3)                                                                                                     | 2149.06(11)                                                                                     | 4364.82(19)                                                                                                 |
| <i>Z</i>                                                                                  | 4                                                                                                             | 4                                                                                               | 4                                                                                                           |
| $\mu$ (Mo-K $\alpha$ ) /mm <sup>-1</sup>                                                  | 1.346                                                                                                         | 4.517                                                                                           | 7.232                                                                                                       |
| <i>F</i> (000)                                                                            | 4464                                                                                                          | 1352                                                                                            | 2080                                                                                                        |
| Total number reflns                                                                       | 74108                                                                                                         | 14822                                                                                           | 78496                                                                                                       |
| <i>R</i> <sub>int</sub>                                                                   | 0.0774                                                                                                        | 0.0346                                                                                          | 0.0791                                                                                                      |
| Unique reflns                                                                             | 10118                                                                                                         | 3237                                                                                            | 8919                                                                                                        |
| No. of params, restraints                                                                 | 490, 468                                                                                                      | 134, 0                                                                                          | 534, 9                                                                                                      |
| GOF                                                                                       | 1.042                                                                                                         | 1.054                                                                                           | 1.085                                                                                                       |
| <i>R</i> <sub>1</sub> , w <i>R</i> <sub>2</sub> [ <i>I</i> > 2σ( <i>I</i> )] <sup>b</sup> | 0.0602, 0.1519                                                                                                | 0.0203, 0.0453                                                                                  | 0.0624, 0.1642                                                                                              |
| <i>R</i> <sub>1</sub> , w <i>R</i> <sub>2</sub> (all data)                                | 0.0959, 0.1674                                                                                                | 0.0246, 0.0464                                                                                  | 0.0671, 0.1681                                                                                              |

|                                                                                                    |                                                                                                                                |                                                                                                                           |                                                                                                                        |
|----------------------------------------------------------------------------------------------------|--------------------------------------------------------------------------------------------------------------------------------|---------------------------------------------------------------------------------------------------------------------------|------------------------------------------------------------------------------------------------------------------------|
| Complex                                                                                            | [Sn(OTf) <sub>2</sub> {o-C <sub>6</sub> H <sub>4</sub> (PPh <sub>2</sub> ) <sub>2</sub> }]<br>·CH <sub>2</sub> Cl <sub>2</sub> | [Sn(OTf){P(CH <sub>2</sub> CH <sub>2</sub> PPh <sub>2</sub> ) <sub>3</sub> }] [OTf]<br>·CH <sub>2</sub> Cl <sub>2</sub> * | [Ge{MeC(CH <sub>2</sub> PPh <sub>2</sub> ) <sub>3</sub> }] [BARf] <sub>2</sub><br>·0.5 CH <sub>2</sub> Cl <sub>2</sub> |
| Formula                                                                                            | C <sub>33</sub> H <sub>26</sub> Cl <sub>2</sub> F <sub>6</sub> O <sub>6</sub> P <sub>2</sub> S <sub>2</sub> Sn                 | C <sub>45</sub> H <sub>44</sub> Cl <sub>2</sub> F <sub>6</sub> O <sub>6</sub> P <sub>4</sub> S <sub>2</sub> Sn            | C <sub>105.5</sub> H <sub>64</sub> B <sub>2</sub> ClF <sub>48</sub> GeP <sub>3</sub>                                   |
| <i>M</i>                                                                                           | 948.19                                                                                                                         | 1172.39                                                                                                                   | 2466.13                                                                                                                |
| Crystal system                                                                                     | monoclinic                                                                                                                     | monoclinic                                                                                                                | triclinic                                                                                                              |
| Space group (no.)                                                                                  | I1 <sub>2</sub> /a (15)                                                                                                        | P2 <sub>1</sub> /c (14)                                                                                                   | P-1 (2)                                                                                                                |
| <i>a</i> /Å                                                                                        | 26.1551(8)                                                                                                                     | 16.1811(2)                                                                                                                | 12.73530(10)                                                                                                           |
| <i>b</i> /Å                                                                                        | 8.8030(2)                                                                                                                      | 14.49840(10)                                                                                                              | 16.7939(2)                                                                                                             |
| <i>c</i> /Å                                                                                        | 33.6112(9)                                                                                                                     | 21.3672(2)                                                                                                                | 26.6298(3)                                                                                                             |
| $\alpha$ /°                                                                                        | 90                                                                                                                             | 90                                                                                                                        | 79.1070(10)                                                                                                            |
| $\beta$ /°                                                                                         | 107.604(3)                                                                                                                     | 97.9480(10)                                                                                                               | 89.4620(10)                                                                                                            |
| $\gamma$ /°                                                                                        | 90                                                                                                                             | 90                                                                                                                        | 69.1300(10)                                                                                                            |
| <i>U</i> /Å <sup>3</sup>                                                                           | 7376.3(4)                                                                                                                      | 4964.59(9)                                                                                                                | 5215.47(10)                                                                                                            |
| <i>Z</i>                                                                                           | 8                                                                                                                              | 4                                                                                                                         | 2                                                                                                                      |
| $\mu$ (Mo-K $\alpha$ ) /mm <sup>-1</sup>                                                           | 1.112                                                                                                                          | 7.689                                                                                                                     | 0.500                                                                                                                  |
| <i>F</i> (000)                                                                                     | 3776                                                                                                                           | 2368                                                                                                                      | 2466                                                                                                                   |
| Total number reflns                                                                                | 49013                                                                                                                          | 118476                                                                                                                    | 134869                                                                                                                 |
| <i>R</i> <sub>int</sub>                                                                            | 0.0506                                                                                                                         | 0.0657                                                                                                                    | 0.0290                                                                                                                 |
| Unique reflns                                                                                      | 9513                                                                                                                           | 8946                                                                                                                      | 26892                                                                                                                  |
| No. of params, restraints                                                                          | 469, 0                                                                                                                         | 595, 0                                                                                                                    | 1600, 1546                                                                                                             |
| GOF                                                                                                | 1.138                                                                                                                          | 1.050                                                                                                                     | 1.016                                                                                                                  |
| <i>R</i> <sub>1</sub> , w <i>R</i> <sub>2</sub> [ <i>I</i> > 2 $\sigma$ ( <i>I</i> )] <sup>b</sup> | 0.0497, 0.1084                                                                                                                 | 0.0379, 0.1045                                                                                                            | 0.0440, 0.1048                                                                                                         |
| <i>R</i> <sub>1</sub> , w <i>R</i> <sub>2</sub> (all data)                                         | 0.0646, 0.1126                                                                                                                 | 0.0391, 0.1054                                                                                                            | 0.0508, 0.1091                                                                                                         |

|                                                                                                    |                                                                                                     |                                                                                                        |                                                                                                                        |
|----------------------------------------------------------------------------------------------------|-----------------------------------------------------------------------------------------------------|--------------------------------------------------------------------------------------------------------|------------------------------------------------------------------------------------------------------------------------|
| Complex                                                                                            | [Pb(OTf) <sub>2</sub> { <i>o</i> -C <sub>6</sub> H <sub>4</sub> (PMe <sub>2</sub> ) <sub>2</sub> }] | [Pb(OTf) <sub>2</sub> { <i>o</i> -C <sub>6</sub> H <sub>4</sub> (AsMe <sub>2</sub> ) <sub>2</sub> }] * | [{Pb <sub>2</sub> (OTf) <sub>3</sub> {MeC(CH <sub>2</sub> PPh <sub>2</sub> ) <sub>3</sub> } <sub>2</sub> ]OTf<br>·MeCN |
| Formula                                                                                            | C <sub>12</sub> H <sub>16</sub> F <sub>6</sub> O <sub>6</sub> P <sub>2</sub> PbS <sub>2</sub>       | C <sub>12</sub> H <sub>16</sub> As <sub>2</sub> F <sub>6</sub> O <sub>6</sub> PbS <sub>2</sub>         | C <sub>88</sub> H <sub>81</sub> F <sub>12</sub> NO <sub>12</sub> P <sub>6</sub> Pb <sub>2</sub> S <sub>4</sub>         |
| <i>M</i>                                                                                           | 703.50                                                                                              | 791.40                                                                                                 | 2300.97                                                                                                                |
| Crystal system                                                                                     | triclinic                                                                                           | monoclinic                                                                                             | orthorhombic                                                                                                           |
| Space group (no.)                                                                                  | P-1 (2)                                                                                             | P2 <sub>1</sub> /c (14)                                                                                | Pbca (61)                                                                                                              |
| <i>a</i> /Å                                                                                        | 10.4025(2)                                                                                          | 10.58200(10)                                                                                           | 20.7298(2)                                                                                                             |
| <i>b</i> /Å                                                                                        | 10.4520(2)                                                                                          | 21.4899(2)                                                                                             | 29.4124(2)                                                                                                             |
| <i>c</i> /Å                                                                                        | 11.9474(3)                                                                                          | 9.72860(10)                                                                                            | 29.6444(2)                                                                                                             |
| $\alpha$ /°                                                                                        | 105.687(2)                                                                                          | 90                                                                                                     | 90                                                                                                                     |
| $\beta$ /°                                                                                         | 106.932(2)                                                                                          | 95.1510(10)                                                                                            | 90                                                                                                                     |
| $\gamma$ /°                                                                                        | 110.441(2)                                                                                          | 90                                                                                                     | 90                                                                                                                     |
| <i>U</i> /Å <sup>3</sup>                                                                           | 1059.39(4)                                                                                          | 2203.41(4)                                                                                             | 18074.6(2)                                                                                                             |
| <i>Z</i>                                                                                           | 2                                                                                                   | 4                                                                                                      | 8                                                                                                                      |
| $\mu$ (Mo-K $\alpha$ ) /mm <sup>-1</sup>                                                           | 8.389                                                                                               | 20.735                                                                                                 | 4.005                                                                                                                  |
| <i>F</i> (000)                                                                                     | 668                                                                                                 | 1480                                                                                                   | 9104                                                                                                                   |
| Total number reflns                                                                                | 15069                                                                                               | 21504                                                                                                  | 274211                                                                                                                 |
| <i>R</i> <sub>int</sub>                                                                            | 0.0230                                                                                              | 0.0280                                                                                                 | 0.0381                                                                                                                 |
| Unique reflns                                                                                      | 6025                                                                                                | 3966                                                                                                   | 23338                                                                                                                  |
| No. of params, restraints                                                                          | 266, 0                                                                                              | 266, 218                                                                                               | 1157, 603                                                                                                              |
| GOF                                                                                                | 1.035                                                                                               | 1.053                                                                                                  | 1.017                                                                                                                  |
| <i>R</i> <sub>1</sub> , w <i>R</i> <sub>2</sub> [ <i>I</i> > 2 $\sigma$ ( <i>I</i> )] <sup>b</sup> | 0.0192, 0.0419                                                                                      | 0.0289, 0.0675                                                                                         | 0.0191, 0.426                                                                                                          |
| <i>R</i> <sub>1</sub> , w <i>R</i> <sub>2</sub> (all data)                                         | 0.0219, 0.0430                                                                                      | 0.0294, 0.0678                                                                                         | 0.0244, 0.0448                                                                                                         |

|                                                                                           |                                                                                                |                                                                                                                                   |                                                                                                                                   |
|-------------------------------------------------------------------------------------------|------------------------------------------------------------------------------------------------|-----------------------------------------------------------------------------------------------------------------------------------|-----------------------------------------------------------------------------------------------------------------------------------|
| Complex                                                                                   | [Pb(OTf){P(CH <sub>2</sub> CH <sub>2</sub> PPh <sub>2</sub> ) <sub>3</sub> }]OTf<br>·MeCN      | [Sn{MeC(CH <sub>2</sub> PPh <sub>2</sub> ) <sub>3</sub> }][BAR <sup>F</sup> ] <sub>2</sub><br>·0.5CH <sub>2</sub> Cl <sub>2</sub> | [Pb{MeC(CH <sub>2</sub> PPh <sub>2</sub> ) <sub>3</sub> }][BAR <sup>F</sup> ] <sub>2</sub><br>·0.5CH <sub>2</sub> Cl <sub>2</sub> |
| Formula                                                                                   | C <sub>46</sub> H <sub>45</sub> F <sub>6</sub> NO <sub>6</sub> P <sub>4</sub> PbS <sub>2</sub> | C <sub>105.5</sub> H <sub>64</sub> B <sub>2</sub> ClF <sub>48</sub> P <sub>3</sub> Sn                                             | C <sub>105.5</sub> H <sub>64</sub> B <sub>2</sub> ClF <sub>48</sub> P <sub>3</sub> Pb                                             |
| <i>M</i>                                                                                  | 1217.02                                                                                        | 2512.23                                                                                                                           | 2600.73                                                                                                                           |
| Crystal system                                                                            | monoclinic                                                                                     | triclinic                                                                                                                         | triclinic                                                                                                                         |
| Space group (no.)                                                                         | P2 <sub>1</sub> /c (14)                                                                        | P-1 (2)                                                                                                                           | P-1 (2)                                                                                                                           |
| <i>a</i> /Å                                                                               | 16.3354(5)                                                                                     | 12.7643(2)                                                                                                                        | 12.7607(2)                                                                                                                        |
| <i>b</i> /Å                                                                               | 14.2959(3)                                                                                     | 16.7092(2)                                                                                                                        | 16.7182(2)                                                                                                                        |
| <i>c</i> /Å                                                                               | 21.6774(5)                                                                                     | 26.6628(3)                                                                                                                        | 26.6413(3)                                                                                                                        |
| $\alpha$ /°                                                                               | 90                                                                                             | 78.5010(10)                                                                                                                       | 78.0880(10)                                                                                                                       |
| $\beta$ /°                                                                                | 102.940(2)                                                                                     | 89.4220(10)                                                                                                                       | 89.0490(10)                                                                                                                       |
| $\gamma$ /°                                                                               | 90                                                                                             | 69.6880(10)                                                                                                                       | 69.7810(10)                                                                                                                       |
| <i>U</i> /Å <sup>3</sup>                                                                  | 4933.7(2)                                                                                      | 5215.19(12)                                                                                                                       | 5208.49(12)                                                                                                                       |
| <i>Z</i>                                                                                  | 4                                                                                              | 2                                                                                                                                 | 2                                                                                                                                 |
| $\mu$ (Mo-K $\alpha$ ) /mm <sup>-1</sup>                                                  | 3.704                                                                                          | 0.451                                                                                                                             | 1.826                                                                                                                             |
| <i>F</i> (000)                                                                            | 2416                                                                                           | 2502                                                                                                                              | 2566                                                                                                                              |
| Total number reflns                                                                       | 44954                                                                                          | 141657                                                                                                                            | 134409                                                                                                                            |
| <i>R</i> <sub>int</sub>                                                                   | 0.0373                                                                                         | 0.0332                                                                                                                            | 0.0408                                                                                                                            |
| Unique reflns                                                                             | 11554                                                                                          | 31821                                                                                                                             | 26898                                                                                                                             |
| No. of params, restraints                                                                 | 604, 0                                                                                         | 1572, 1784                                                                                                                        | 1544, 1392                                                                                                                        |
| GOF                                                                                       | 1.019                                                                                          | 1.036                                                                                                                             | 1.028                                                                                                                             |
| <i>R</i> <sub>1</sub> , w <i>R</i> <sub>2</sub> [ <i>I</i> > 2σ( <i>I</i> )] <sup>b</sup> | 0.0314, 0.0515                                                                                 | 0.0443, 0.0987                                                                                                                    | 0.0343, 0.0794                                                                                                                    |
| <i>R</i> <sub>1</sub> , w <i>R</i> <sub>2</sub> (all data)                                | 0.0470, 0.0546                                                                                 | 0.0536, 0.1032                                                                                                                    | 0.0383, 0.0815                                                                                                                    |

<sup>a</sup> Common items: T = 100 K;  $\theta$ (max) = 27.5°; wavelength (Mo-K $\alpha$ ) = 0.71073 Å, except for those marked \* which used (Cu- K $\alpha$ ) radiation.  $\lambda$  = 1.54184 Å; <sup>b</sup>  $R_1 = \sum ||F_o| - |F_c|| / \sum |F_o|$ ;  $wR_2 = [\sum w(F_o^2 - F_c^2)^2 / \sum wF_o^4]^{1/2}$

**Table S2 Experimental (X-ray) vs. calculated (DFT, B3LYP-D3) metrics for  $[M\{\text{MeC}(\text{CH}_2\text{PPh}_2)_3\}]^{2+}$  (M = Ge, Sn, Pb)**

|                                                             |                                        |                                  |
|-------------------------------------------------------------|----------------------------------------|----------------------------------|
| $[\text{Ge}\{\text{MeC}(\text{CH}_2\text{PPh}_2)_3\}]^{2+}$ | X-ray                                  | DFT                              |
| d(Ge-P) / Å                                                 | 2.4070(4)<br>2.4239(4)<br>2.4110(5)    | 2.42947<br>2.42978<br>2.42966    |
| $\angle(\text{P-Ge-P}) / ^\circ$                            | 86.609(14)<br>85.412(15)<br>85.912(15) | 86.13757<br>86.17999<br>86.15668 |
| $[\text{Sn}\{\text{MeC}(\text{CH}_2\text{PPh}_2)_3\}]^{2+}$ | X-ray                                  | DFT                              |
| d(Sn-P) / Å                                                 | 2.6194(4)<br>2.6438(4)<br>2.6249(4)    | 2.64552<br>2.64663<br>2.64198    |
| $\angle(\text{P-Sn-P}) / ^\circ$                            | 82.120(13)<br>80.160(14)<br>80.761(14) | 80.81234<br>81.57846<br>80.70846 |
| $[\text{Pb}\{\text{MeC}(\text{CH}_2\text{PPh}_2)_3\}]^{2+}$ | X-ray                                  | DFT                              |
| d(Pb-P) / Å                                                 | 2.7092(6)<br>2.7184(7)<br>2.7360(5)    | 2.71964<br>2.72140<br>2.72068    |
| $\angle(\text{P-Pb-P}) / ^\circ$                            | 77.868(17)<br>80.594(17)<br>78.676(17) | 79.51974<br>79.61498<br>79.72607 |
